1 **Title:** Growth phase estimation for abundant bacterial populations sampled longitudinally from  
2 human stool metagenomes.

3 **Authors:** Joe J. Lim<sup>1</sup>, Christian Diener<sup>2</sup>, James Wilson<sup>2</sup>, Jacob J. Valenzuela<sup>2</sup>, Nitin S. Baliga<sup>2-3</sup>,  
4 Sean M. Gibbons<sup>2,4-6,\*</sup>

5 **Affiliations:** <sup>1</sup> Department of Environmental & Occupational Health Sciences, University of  
6 Washington, Seattle, WA 98105; <sup>2</sup> Institute for Systems Biology, Seattle, WA 98109; <sup>3</sup>  
7 Department of Microbiology, University of Washington, Seattle, WA 98105; <sup>4</sup> Department of  
8 Bioengineering, University of Washington, Seattle, WA 98105; <sup>5</sup> Department of Genome  
9 Sciences, University of Washington, Seattle, WA 98105; <sup>6</sup> eScience Institute, University of  
10 Washington, Seattle, WA 98105

11 \* corresponding author: [sgibbons@isbscience.org](mailto:sgibbons@isbscience.org)

12

### 13 **ABSTRACT**

14 Longitudinal sampling of the stool has yielded important insights into the ecological dynamics of  
15 the human gut microbiome. However, due to practical limitations, the most densely sampled  
16 time series from the human gut are collected at a frequency of about once per day, while the  
17 population doubling times for gut commensals are on the order of minutes-to-hours. Despite  
18 this, much of the prior work on human gut microbiome time series modeling has, implicitly or  
19 explicitly, assumed that day-to-day fluctuations in taxon abundances are related to population  
20 growth or death rates, which is likely not the case. Here, we propose an alternative model of the  
21 human gut as a flow-through ecosystem at a dynamical steady state, where population  
22 dynamics occur internally and the bacterial population sizes measured in a bolus of stool  
23 represent an endpoint of these internal dynamics. We formalize this idea as stochastic logistic  
24 growth of a population in a system held at a semi-constant flow rate. We show how this model  
25 provides a path toward estimating the growth phases of gut bacterial populations *in situ*. We  
26 validate our model predictions using an *in vitro Escherichia coli* growth experiment. Finally, we  
27 show how this method can be applied to densely-sampled human stool metagenomic time  
28 series data. Consistent with our model, stool donors with slower defecation rates tended to  
29 harbor a larger proportion of taxa in later growth phases, while faster defecation rates were  
30 associated with more taxa in earlier growth phases. We discuss how these growth phase  
31 estimates may be used to better inform metabolic modeling in flow-through ecosystems, like  
32 animal guts or industrial bioreactors.

33

34

35

## 36 INTRODUCTION

37 The human gut is an anaerobic flow-through bioreactor, ecologically distinct to each individual,  
38 that transforms dietary and host substrates into bioactive molecules important to host health<sup>1-3</sup>.  
39 Disruptions to the ecological composition of the gut have been shown to mediate the  
40 progression of various complex diseases<sup>4-8</sup>. Furthermore, the ecological dynamics of the gut  
41 appear to be relevant to both health and disease states<sup>9,10</sup>. However, the biological  
42 interpretation of densely-sampled adult human fecal microbiome time series is fraught.

43 Various dynamical models have been applied to gut microbial abundance data collected  
44 from adult human donors<sup>11-15</sup>. These models often assume, either explicitly or implicitly, that  
45 day-to-day changes in abundance are proportional to population growth and/or death<sup>16</sup>.  
46 However, the underlying data often do not match this assumption<sup>11,16-20</sup>. The gut is a flow-  
47 through ecosystem and commensal gut bacteria must grow fast enough to avoid dilution-to-  
48 extinction. As such, gut bacterial doubling times tend to be fast, ranging from minutes-to-hours  
49<sup>21-23</sup>. However, stool sampling frequency is usually limited to, at most, about once per day.  
50 Consequently, rapid internal population dynamics likely cannot be directly estimated from the  
51 day-to-day measurements obtained from stool<sup>16</sup>.

52 Given these sampling limitations, and in the absence of major perturbations that require  
53 multi-day recovery processes in the human gut, it is unclear whether or not meaningful insights  
54 into commensal population dynamics can be gleaned from adult human gut microbiome time  
55 series. One workaround for inferring growth rates of bacterial populations *in situ* is to leverage  
56 metagenome-inferred replication rates<sup>21,22</sup>. Briefly, instantaneous replication rates can be  
57 estimated for abundant bacterial populations in metagenomic samples by taking advantage of  
58 the fact that fast-growing taxa show an asymmetry in reads mapping to different genomic loci,  
59 with higher read depth near the origin of replication and a lower depth near the terminus due to

60 the initiation of multiple replication forks<sup>21–23</sup>. However, even when replication rates and  
61 population abundances can both be estimated from the same metagenomic samples, it is  
62 unclear how these measurements are related to the *in situ* growth phase of a population. As  
63 such, biological interpretations regarding population size and replication rate fluctuations in flow-  
64 through ecosystems like the human gut, where internal dynamics are much faster than sampling  
65 rates, remain challenging.

66 Early experiments by Jaques Monod<sup>24</sup> identified distinct growth phases for bacterial  
67 populations in culture, which can be captured by the stochastic logistic growth equation (sLGE)  
68<sup>25</sup>. The sLGE has been shown to be a good fit for bacterial population growth *in vitro* and in real-  
69 world, steady-state ecosystems<sup>26–32</sup>. We used the sLGE to study statistical relationships  
70 between population sizes and growth rates across the various phases of growth (i.e.,  
71 acceleration, mid-log, deceleration, stationary phases) to see if we could extract *in situ* growth  
72 phase information. Overall, the sLGE model yields statistical relationships that may be  
73 leveraged to identify the *in situ* growth phase of a bacterial population sampled at a regular  
74 period from a flow-through ecosystem, like the human gut.

75 To assess our model predictions, we sampled *Escherichia coli* populations at different  
76 points along the growth curve. We calculated population sizes and replication rates for these  
77 samples and observed excellent agreement between this *in vitro* model and our sLGE  
78 predictions. We also measured population abundance and replication rate trajectories from  
79 more than a dozen organisms across four densely sampled human gut metagenomic time  
80 series<sup>33</sup>. On average, gut commensal growth rates and population sizes were positively  
81 correlated, both cross-sectionally over 84 stool donors and longitudinally within each of four  
82 stool donor time series, which suggests that most abundant taxa in the gut are growing  
83 exponentially when sampled in stool. Furthermore, we were able to identify specific growth  
84 phase signatures in abundant bacterial populations in the guts of four individuals with long and

85 dense metagenomic time series by analyzing paired replication rate and abundance trajectories.  
86 We describe how our growth phase inference approach can serve to improve statistical  
87 inferences derived from microbiome data and to inform more accurate mechanistic modeling of  
88 flow-through ecosystems (e.g., community-scale metabolic models, which usually assume  
89 exponential growth), which could have broad implications for human health<sup>8,34,35</sup>, agricultural  
90 systems<sup>36,37</sup>, climate change<sup>36,38,39</sup>, and industrial bioreactor production processes<sup>40,41</sup>.

91

## 92 **RESULTS**

### 93 ***Framing the gut as an anaerobic flow-through bioreactor***

94 The mammalian gut can be understood as an anaerobic batch culture reactor with a semi-  
95 continuous input (i.e., discrete boluses of dietary inputs, mixed with host substrates like mucin  
96 and bile acids) and output (i.e., discrete boluses of stool)<sup>42</sup>, and microbial taxa must grow fast  
97 enough within the system to avoid dilution-to-extinction (**Fig. 1A**). Thus, stool sampling captures  
98 the endpoint of internal gut bacterial population dynamics. For example, in our conceptual figure  
99 we see that Taxon 1 starts growing higher up in the colon and is in stationary phase by the time  
100 a stool sample is collected, while Taxon 3 starts growing lower in the colon and is still growing  
101 exponentially at the point of stool sampling (**Fig. 1A**). Overall, the daily abundances of Taxa 1-3  
102 represent the average ( $\mu$ ) steady-state population size, plus or minus some amount of biological  
103 and technical noise, at the time of stool sampling (**Fig. 1A**). To investigate improved methods  
104 for interpreting the dynamics of human gut microbial time series, we downloaded shotgun  
105 metagenomic time series data from the BIO-ML cohort (i.e., health-screened stool donors who  
106 provided fecal-transplant material to the stool bank OpenBiome)<sup>33</sup>. The BIO-ML cohort  
107 contained 84 donors<sup>33</sup>. To filter for dense longitudinal data, we selected a subset of donors with  
108 more than 50 time points. Four donors (i.e. donors ae, am, an, and ao) met this criterion, with 3-  
109 5 fecal samples per week for >50 days (**Fig. 1B**).

110

111 ***Characterizing the relationships between gut commensal population size and growth rate***  
112 ***using metagenomic time series data***

113 We first investigated the statistical properties of day-to-day fluctuations in gut bacterial  
114 population sizes, estimated from fecal shotgun metagenomic time series. Specifically, we  
115 looked at the associations between population abundance estimates ( $t_n$ ) and the changes in  
116 abundance estimates (i.e., deltas) between time points ( $t_{n+1} - t_n$ ). Naïvely, if most bacterial  
117 populations in stool were growing exponentially, we would expect that population abundances  
118 and growth rates would be positively correlated. However, prior work has indicated an overall  
119 negative correlation between abundances and changes in abundances in stool 16S rRNA gene  
120 amplicon sequencing data generated from densely sampled human stool time series<sup>15</sup>. Indeed,  
121 we found that abundant bacterial populations in the stool of the four BIO-ML donors maintained  
122 stable average abundances over time ( $\mu$ ), with day-to-day fluctuations above and below this  
123 average, as pictured in the example of *Bacteroides cellulosilyticus* in donor am (**Fig. 2A-B**). This  
124 kind of pattern mirrors what one would expect when randomly sampling from a stationary  
125 distribution (**Fig. 2B**). We observed that the deltas ( $t_{n+1} - t_n$ ) for the same gut taxon (*Bacteroides*  
126 *uniformis*) measured across each donor time series, when plotted against their respective  
127 normalized abundances ( $t_n$ ), showed the expected negative association (**Fig. 2C**). Furthermore,  
128 similar negative associations were uniformly observed across all taxa analyzed, across all four  
129 donors (**Fig. 2D**). This negative association between population abundances and changes in  
130 abundance between time points is strongly consistent with sampling from a stationary  
131 distribution, which is equivalent to ‘regression-to-the-mean’ as an organism fluctuates around a  
132 fixed carrying capacity, similar to what we have reported previously<sup>15,32</sup>.

133 One important ecological factor that can impact gut microbial dynamics is host diet<sup>43,44</sup>.

134 Although changes in dietary intake can alter microbial abundance, average dietary choices are

135 highly conserved within an individual and these choices are notoriously difficult to modify  
136 outside of radical changes in geography or lifestyle<sup>45-47</sup>. Prior work demonstrated that  
137 macronutrient intake within an individual is largely stable over time and does not show  
138 significant autocorrelation or drift<sup>15,48</sup>. Indeed, for donor A from this prior study, we found that  
139 longitudinal measurements of macronutrients (i.e. daily intake of calories, carbohydrates,  
140 protein, fat, fiber, cholesterol, saturated fat, sugar, sodium, calcium) were stationary over  
141 several months, despite day-to-day fluctuations (**Fig. S1**). Combined with the overwhelming  
142 stationarity of microbial abundance trajectories within healthy individuals not undergoing major  
143 lifestyle changes<sup>15,32,33</sup>, these results support our assertion that dietary patterns are largely  
144 stable over weeks-to-months and stool samples provide stable, steady-state population  
145 abundance estimates of abundant gut commensal bacteria.

146       Next, we looked at the statistical associations between calculated peak-to-trough ratios  
147 (i.e., PTRs; a proxy for growth-rate) for abundant bacterial populations from each metagenomic  
148 sample and their respective metagenomic population abundance estimates<sup>22</sup>. If the deltas,  
149 presented above, were truly proportional to growth and/or death rates, we would expect that the  
150 statistical relationships between deltas and population size would be similar to those between  
151 PTRs and population size. However, unlike the regression-to-the-mean signature identified for  
152 the deltas, we found variable statistical relationships between  $\log_2$ PTR and centered log-ratio  
153 (CLR) transformed population abundances for the same taxon across the four donors  
154 (*Bacteroides ovatus*, **Fig. 3A**). Similarly, we saw a wide range of positive, negative, and null  
155 associations between  $\log_2$ PTRs and CLR abundances across all measured taxa within each  
156 donor (**Fig. 3B**). These results are inconsistent with a regression-to-the-mean signal, and  
157 suggest a more complex relationship between growth rate and population size<sup>49-51</sup>. Finally, we  
158 calculated temporally-averaged (i.e., mean for all collection time within a taxon) PTRs and  
159 population sizes for each abundant taxon within each of the four donors. Overall, there was a

160 significantly positive association (linear regression,  $p$ -values = 0.0318, 0.125, 0.155, 0.031 for  
161 donors ae, am, an, and ao, respectively; combined  $p$ -value using Fisher's method = 0.005)  
162 between average  $\log_2$ PTR and average CLR abundance across all four donors (**Fig. 3C**),  
163 indicating that taxa with higher average population sizes tend to have higher average growth  
164 rates. This result is consistent with what one would expect to observe in exponentially-growing  
165 populations. We also looked into whether or not  $\log_2$ PTR magnitudes were inter-comparable  
166 across taxa (**Fig. S2**). We calculated  $\log_2$ PTRs for all abundant taxa detected across all 84 BIO-  
167 ML donors and found that the median  $\log_2$ PTR was fairly similar across taxonomic classes  
168 ( $\sim$ 0.45-0.75), with most classes showing a wide range of  $\log_2$ PTRs (**Fig. S2**). To assess  
169 whether or not  $\log_2$ PTR-CLR associations were robust to controlling for taxonomy, we included  
170 either class- or species-level categorizations as covariates in a linear regression model and saw  
171 a significant association, independent of taxonomy (class-level  $\beta = 0.0612$ ,  $p = 8.359e^{-60}$ ;  
172 species-level  $\beta = 0.0101$ ,  $p = 0.0006$ ).

173

#### 174 ***Stochastic logistic growth equation provides insights into growth phases***

175 In order to better understand and interpret the varying relationships we observe between  
176  $\log_2$ PTRs and CLR abundance time series, we used a modeling approach. The basic properties  
177 of growth curves of microbial taxa can be captured using the logistic growth equation (**Fig. 4**).  
178 This model is defined such that the change in abundance for each taxon  $i$  ( $dx_i/dt$ ) is captured  
179 by the current abundance at time  $t$ ,  $x_i(t)$ , multiplied by the maximal growth rate,  $r$ , and the  
180 carrying capacity ( $k$ ) term  $(1 - x_i(t)/k)^{52}$ . In this model, population size over time shows a  
181 sigmoidal curve, with the abundance asymptotically approaching  $k$  (**Fig. 4A**, top panel). The  
182 derivative of this curve with respect to time yields the growth rate over time, which peaks during  
183 mid-log phase (**Fig. 4A**, middle panel). The second derivative of abundance with respect to  
184 time, which is the instantaneous change in growth with respect to time and is often referred to

185 as the acceleration rate, shows a peak during the acceleration phase and a trough during the  
186 deceleration phase (**Fig. 4A**, bottom panel). Based on this second-derivative curve, we show  
187 the expected relationships between growth rate and abundance as you move across the logistic  
188 growth curve, along the time axis (**Fig. 4B**). These expected relationships provide a potential  
189 path forward for inferring the *in situ* growth phase of a bacterial population sampled at a  
190 consistent frequency from a flow-through ecosystem.

191 The logistic growth model is a deterministic equation. However, the observed  
192 abundances of commensal bacterial populations in the gut fluctuate due to myriad factors  
193 including interspecies competition, resource fluctuations, technical noise, sampling noise, and  
194 stool residence time<sup>27,32,53</sup>. In order to approximate these fluctuations in our modeling, we  
195 introduced a stochastic term to the logistic growth model (**Fig. 5A**). Herein,  $\sigma$  denotes the noise  
196 magnitude and  $\omega(t)$  represents a white noise term. Four growth phases (i.e., acceleration, mid-  
197 log, deceleration, and stationary) were defined using the half-maximum and half-minimum,  
198 respectively, of the second derivative of the LGE curve (**Fig. S3A**). We simulated 100 iterations  
199 of the stochastic logistic growth equation (sLGE) for each of a range of parameterizations (see  
200 Methods), which recapitulated the expected statistical relationships between growth rates and  
201 abundances for populations consistently sampled within our four major growth phase categories  
202 (**Fig. 5A-C**). For example, Pearson's correlations between growth rates and abundances were  
203 significantly positive in the acceleration phase and significantly negative in the deceleration  
204 phase (**Fig. 5B**). Mid-log phase growth was more variable, but showed little-to-no significant  
205 association between growth rates and abundances (**Fig. 5B-C**). These results were reproduced  
206 across a wide range of parameter space and were robust to varying noise levels (**Fig. S3B**).

207 Even though we expect dietary intake to be stationary within an individual, variation in  
208 diet can drive day-to-day fluctuations in the carrying capacities of microbial populations. In order  
209 to investigate whether growth-phase specific associations between abundances and growth



210 rates were influenced by fluctuations in carrying capacity, we added variation to  $k$  in the sLGE  
211 model (**Fig. S4**). Fluctuations in  $k$  did not alter the sigmoidal shape of the sLGE curve (**Fig.**  
212 **S4A**), and the relationships between abundances and growth rates across growth phases were  
213 preserved (**Fig. S4B-C**).

214

### 215 ***Validating sLGE growth phase inferences in vitro***

216 To validate the relationship between growth rates and abundances across growth phases, we  
217 cultured replicate *E. coli* populations *in vitro* and sampled them across their growth curves (**Fig.**  
218 **6A**). *E. coli* abundances were measured as OD600 values and as the log-ratio of *E. coli* reads  
219 to phiX reads (i.e., a fixed amount of the phiX genome was spiked into each DNA extraction)  
220 from the shotgun sequencing data (**Fig. 6A-C**). Growth rates were quantified as the  $\log_2$ PTR for  
221 each *E. coli* sample<sup>54</sup>. The relationships between the  $\log_2$ PTRs and CLR-normalized *E. coli*  
222 abundances across growth phases matched the sLGE model predictions (**Fig. 6B-C**).  
223 Specifically, growth rates and abundances were significantly positively and negatively correlated  
224 in acceleration and deceleration phases, respectively (**Fig. 6B-C**). Furthermore, we saw no  
225 significant association between growth rates and abundances in mid-log and stationary phases  
226 (**Fig. 6B-C**). Finally, we found that samples in mid-log phase had an average  $\log_2$ PTR of  
227  $1.25 \pm 0.167$  ( $\pm$  standard deviation), while samples in stationary phase had an average  $\log_2$ PTR  
228 of  $0.358 \pm 0.059$ , which clearly distinguished between these phases.

229

### 230 ***Inferring in situ growth phases for abundant gut commensal populations sampled in*** 231 ***metagenomic time series***

232 Based on the sLGE results and *in vitro* validation work presented above, we assigned putative  
233 *in situ* growth phases to abundant gut bacterial populations from the four BIO-ML gut  
234 metagenomic time series. The average magnitude of the PTR provides additional information on

235 whether a population is more likely to be in acceleration/mid-log/deceleration (i.e.,  $\log_2\text{PTR} >>$   
236 0.358) or stationary (i.e.,  $\log_2\text{PTR} < 0.358$ ) phase (**Fig. 6**). For those taxa with average  
237  $\log_2\text{PTR}$ s above the empirical stationary phase threshold, significantly positive associations  
238 (linear regression, adjusted  $p$ -value  $< 0.05$ , with a positive beta-coefficient) between  $\log_2\text{PTR}$ s  
239 and CLR abundances likely indicate acceleration-phase and significantly negative associations  
240 (linear regression, adjusted  $p$ -value  $< 0.05$ , with negative beta-coefficient) likely indicate  
241 deceleration phase. *Bacteroides cellulosilyticus*, *Bacteroides ovatus 1*, and *Megaspaera eldenii*  
242 showed significantly positive PTR-abundance associations within donor ae (**Figs. 7A and S5**).  
243 *Bacteroides xylanisolvens* had an average  $\log_2\text{PTR}$  less than the stationary threshold in donor  
244 am (**Fig. S6**). *Bacteroides ovatus 1* and *Parabacteroides distasonis* showed positive  $\log_2\text{PTR}$ -  
245 CLR abundance associations, while *Alistipes finegoldii*, and *Bacteroides uniformis* showed  
246 negative associations in donor am (**Figs. 7A and S6**). *Acidaminococcus intestini*, *Bacteroides*  
247 *xylanisolvens*, and *Odoribacter splanchnicus* showed average  $\log_2\text{PTR}$  below the empirical  
248 stationary phase threshold in donor an (**Fig. S7**). *Alistipes shahii*, *Bacteroides intestinalis*,  
249 *Bacteroides thetaiotaomicron*, and *Bacteroides uniformis* showed significantly negative  
250  $\log_2\text{PTR}$ -CLR abundance associations in donor an (**Figs. 7A and S7**). Finally, *Favonifractor*  
251 *plautii* showed a positive  $\log_2\text{PTR}$ -CLR abundance association and *Bacteroides fragilis*,  
252 *Bacteroides ovatus 1*, *Bacteroides uniformis*, and *Bacteroides xylanisolvens* showed negative  
253 associations in donor ao (**Fig. 7A and S8**). In all four donors, many taxa showed average  
254  $\log_2\text{PTR}$ s greater than the stationary threshold but without significant associations between  
255  $\log_2\text{PTR}$  and CLR abundances (**Figs. 7A and S5-8**). The absence of a significant association  
256 for these non-stationary taxa likely indicates mid-log phase, but a non-significant association  
257 could also represent a false negative (i.e., not powered enough to detect a positive or negative  
258 association with the number of time points sampled).

259 We observed a slight difference in the number of significantly positive and negative PTR-  
260 abundance associations between donors ae/am, and an/ao. Donors ae and am tended to have  
261 a larger proportion of taxa in acceleration phase, while an and ao tended to have a larger  
262 proportion of taxa in deceleration or stationary phases. Interestingly, donors an and ao had a  
263 lower average defecation frequency ( $\leq 1$  per day) than donors ae and am ( $> 1$  per day).  
264 Concordantly, based on our flow-through model of the gut ecosystem (**Fig. 1A**), we would  
265 expect that bacterial populations would be pushed towards earlier growth phases at faster flow  
266 rates (**Fig. 7B**). Overall, we were able to at least partially constrain our phase estimates for all  
267 taxa with sufficient longitudinal data (**Fig. 7A**). Our approach provides a new path toward  
268 providing constraints on *in situ* growth phases for microbial populations in flow-through  
269 ecosystems.

270

## 271 **DISCUSSION**

272 Many prior studies assumed, either implicitly or explicitly, that the growth and death rates of gut  
273 bacterial populations were proportional to day-to-day changes in abundances, as measured  
274 from human stool samples. However, we outline how this assumption is likely invalid due to the  
275 fact that human gut bacterial population growth/death processes inside the intestinal tract are  
276 known to be faster (minutes-to-hours) than our sampling timescales (days). In support of this  
277 assertion, we show how the statistical relationships between changes in abundance ( $t_{n+1} - t_n$ )  
278 and abundances ( $t_n$ ), estimated from stool metagenomic time series, indicate a regression-to-  
279 the-mean effect that one would expect when sampling from a steady-state population fluctuating  
280 around a carrying capacity (**Figs. 1-2**). Thus, as prior work has indicated<sup>15,32</sup>, bacterial taxa in

281 the gut have stable average population sizes, which likely represent steady-state endpoints of  
282 internal dynamics (**Figs. 1-2**). Despite the fundamental mismatch between gut bacterial  
283 population dynamics and sampling timescales, we attempt to identify statistical signatures within  
284 these daily-sampled human gut time series that might provide accurate insights into *in situ*  
285 population dynamics.

286 While changes in abundance between time points do not appear to be related to  
287 population growth, PTRs enable direct estimates of *in situ* growth rates from metagenomic  
288 samples<sup>21–23,55–57</sup>. Unlike the relationships between deltas and abundances, which were always  
289 negative (**Fig. 2C-D**), the relationships between PTRs and abundances were quite variable (**Fig.**  
290 **3A-B**). While regression-to-the-mean is a plausible mechanism for the consistent negative  
291 delta-abundance relationships (**Fig. 2**), the underlying processes driving variable log<sub>2</sub>PTR-  
292 abundance relationships appear to be more nuanced (**Fig. 3**).

293 We turned to the sLGE to explore relationships between growth rate and abundance  
294 across different phases of growth, and we found clear diagnostic patterns (**Fig. 4**). Simulations  
295 showed a wide range of demographic stochasticity (**Fig. 5**) and fluctuations in carrying  
296 capacities (**Fig. S4**) could not ablate these patterns, although adding enough noise to these  
297 models eventually overrides the signal. We validated these patterns *in vitro* and saw marked  
298 correspondence between model predictions and empirical measurements (**Fig. 5-6**). Finally, we  
299 applied our sLGE predictions to four human gut metagenomic time series. Consistent with our  
300 predictions, we found that individuals with higher defecation rates tended to be enriched for taxa  
301 in earlier growth phases (**Fig. 7**). In a recent study, we observed a similar association between  
302 PTRs and bowel movement frequency (BMF) in another independent cohort, where PTRs  
303 appeared to increase with increasing BMF<sup>58</sup>. Overall, our results reveal a promising approach  
304 to inferring *in situ* growth phases for abundant organisms detected in human gut metagenomic  
305 time series.

306 We observed that the average  $\log_2$ PTR and average CLR abundance of a given taxon  
307 over time were positively correlated, which is consistent with exponentially-growing populations  
308 (**Fig. 3C**). However, despite this average pattern across taxa, we were also able to identify  
309 specific taxa that were abundant in stool that appeared to be in stationary phase (**Fig. 7A**).  
310 These results are highly relevant to the metabolic modeling community. Ecological interactions  
311 within free-living and host-associated microbial communities are largely governed by exchanges  
312 of small-molecule metabolites<sup>59,60</sup>. Genome-scale metabolic modeling and flux-balance analysis  
313 (FBA) has been effective mechanistic tools for simulating these metabolic exchanges, especially  
314 in controlled bioreactor systems<sup>61</sup>. The objective function used to find a solution subspace for  
315 these bacterial FBA models is often biomass maximization, which assumes that these  
316 organisms are growing exponentially at steady state. Exponential growth is a valid assumption  
317 for organisms in acceleration or mid-log phases, and to some extent in deceleration phase, but  
318 this assumption breaks down completely in stationary phase. Prior work has demonstrated that  
319 biomass composition can change depending on the growth phase of a population, which ideally  
320 could be taken into account to more accurately model metabolic fluxes within the system<sup>62-64</sup>.  
321 Alternatively, organisms that are not actively growing could be omitted from community-scale  
322 metabolic models of colonic metabolism<sup>65</sup>. Overall, our work suggests that most abundant  
323 organisms in human stool are amenable to FBA, and our growth phase estimation approach  
324 allows for the identification of abundant populations that may not fit classical FBA assumptions.

325 In conclusion, we provide a new path forward for the biological interpretation of  
326 metagenomic time series data generated from adult human stool samples. Our results are  
327 somewhat reassuring for cross-sectional studies, as they indicate that bacterial abundances in  
328 the gut fluctuate around stable carrying capacities within an individual, making inter-individual  
329 comparisons fairly robust. Furthermore, this suggests that multi-day averages of abundances  
330 will be even more accurate estimates of this carrying capacity, as we have suggested previously

331 <sup>33</sup>. This work is especially relevant to the design and interpretation of human gut microbiome  
332 studies that aim to characterize or investigate ecosystem-scale dynamics. We hope that *in situ*  
333 growth phase estimation will be applied more broadly to other kinds of flow-through  
334 environments to improve our understanding of internal dynamics in these systems and provide  
335 improved constraints for mechanistic modeling of microbial communities.

336

## 337 **METHODS**

### 338 **Stationarity testing for daily nutrient intake in a human stool donor**

339 Metadata for daily nutrient intake, excluding the time window when the donor was traveling  
340 abroad, was downloaded from David et al. <sup>48</sup>. We tested for stationarity in these nutrient intake  
341 time series using the augmented Dickey-Fuller (ADF) test (tseries package in R <sup>66</sup>), with  
342 significance threshold for stationarity at  $p < 0.1$ . ADF tests the null hypothesis that a unit root is  
343 present in a time series, with the alternative hypothesis being that the time series is stationary.  
344 Thus, significant p-values indicate stationarity of the time series. All analyses throughout the  
345 manuscript in R were conducted in R v4.2.2 <sup>67</sup>, unless stated otherwise.

346

### 347 ***E. coli* strain information and growth curve analysis with a microplate reader**

348 *Escherichia coli* strain (MG1655) was streaked from a glycerol stock onto R2A agar plates  
349 (Thermo Fisher Scientific: Oxoid CM0906) and incubated overnight at 37°C. A colony was  
350 selected using an inoculating loop and transferred to 200 mL of LB-broth (Lennox) and grown at  
351 37°C overnight in a shaking incubator at 225 rpm until the culture reached stationary phase. The  
352 overnight culture was then diluted in fresh LB medium to an OD of 0.51 (600 nm). The diluted  
353 culture was then chilled for ~25 minutes at ~2°C using an ice bath to synchronize metabolic  
354 activity. The chilled culture was then aliquoted (2µL) into a non-treated 96-well flat-bottomed  
355 plate (Thomas Scientific Cat No. 1154Q44) containing 198 µL of LB media (Lennox) in each

356 well. The inoculated plate was then transferred to a BioTek Epoch II plate reader set to 37°C  
357 with orbital shaking and programmed to make OD600 readings every minute for the first 60  
358 minutes and every 5 minutes for the remainder of the experiment (~10 hours). The first set of  
359 inoculations covered plate rows A and B (n = 24), this was followed by the sequential  
360 inoculation of the next 3 sets of rows at 15-minute intervals (i.e., Set 1 = A/B: 0 min; Set 2 = C/D  
361 15 min; Set 3 = E/F: 30 min; Set 4 = G/H 45 min.). This resulted in 4 sets of replicate cultures  
362 inoculated 15 minutes apart, allowing sampling every hour for the next 10 hours, spanning 40  
363 time points spaced 15 minutes apart. To ensure there was enough DNA for sequencing at early  
364 low OD time-points (first two sample points), we pooled two wells into one sample. All samples  
365 were collected in PCR strip tubes (Axygen: PCR-0208-CP-C) and centrifuged at room  
366 temperature to pellet the cells. The supernatant was decanted and the remaining cell pellet was  
367 immediately frozen in liquid nitrogen for storage at -80°C.

368

### 369 **DNA extraction, library preparation, and sequencing**

370 Cell Pellets were resuspended and transferred to 96 deep-well plates for DNA extraction using  
371 the IBI Scientific 96-well Genomic DNA Bacteria Kit (IBI Scientific: IB47295) per the  
372 manufacturer's protocol. DNA quantification was done using Qubit HS DNA assay, on a Qubit3  
373 device. After DNA quantification, we added PhiX DNA (Thermo Fisher Scientific: SD0031) as an  
374 internal standard and run-quality monitor across all samples. A total of 500 fg PhiX DNA was  
375 added to each DNA sample before library preparation. DNA libraries were constructed following  
376 the NEBNext Ultra II FS DNA Library Prep Kit for Illumina (New England Biolabs: E7805L) and  
377 indexed using Dual Index Primer Set 2 (New England Biolabs: E7780S). Libraries were  
378 quantified again via Qubit 3, and the quality and size of libraries were checked using an Agilent  
379 Tapestation, and a D5000 high sensitivity DNA tape assay. Libraries were pooled to 2 nM and  
380 sent to NovoGene for sequencing on a NovaSeq 6000 device (Illumina, USA). A partial lane

381 was used for sequencing, 150 cycles, generating ~64GB (~3.3 million reads per sample) of  
382 paired-end reads.

383

### 384 **Shotgun metagenomics data processing and analysis**

385 Longitudinal shotgun metagenomics sequencing data from healthy human stool samples (BIO-  
386 ML) was downloaded from NCBI BioProject accession PRJNA544527, and the associated  
387 metadata was downloaded from the associated article <sup>33</sup>. Raw FASTQ files from the BIO-ML  
388 cohort and from the *in vitro E. coli* experiment were filtered and trimmed using FASTP <sup>68</sup>,  
389 removing the first 5 nucleotides of the read 5' end to avoid leftover primer and adapter  
390 sequencing not removed during demultiplexing and an adaptive sliding window filter on the 3'  
391 end of the read with a required minimum quality score of 20. Reads containing ambiguous base  
392 calls, having a mean quality score less than 20, or with a length smaller than 50nt after trimming  
393 were removed from the analysis. Taxonomic assignment on the read level was performed with  
394 Kraken2 using the Kraken2 default database <sup>69</sup>. Abundances on the kingdom, phylum, genus,  
395 and species ranks were then obtained using Bracken <sup>70</sup>. Trimmed and filtered reads were then  
396 aligned to 2,935 representative bacterial reference genomes taken from the IGG database  
397 (version 1.01) using Bowtie2 <sup>71,72</sup>. Coverage profiles and log<sub>2</sub> estimates of peak-to-trough ratios  
398 (PTRs) were estimated using COPTR v1.1.2 at the species-level within each sample for taxa  
399 that passed our abundance threshold <sup>54</sup>. PTR estimates were then merged with Bracken  
400 abundance estimates, retaining only those species identified by both methods (Kraken2 and  
401 Bowtie2 alignment to IGGdb). For the *in vitro E. coli* experiment, reads were aligned to a custom  
402 database containing the *E. coli K12* strain genome (NCBI accession NC\_000913.3) and the  
403 phiX174 genome (NCBI accession NC\_001422.1). CLR abundances were then calculated from  
404 the read counts for the *E. coli* genome and the phiX174 genome.



405           The processed data containing the raw reads and  $\log_2$  peak-to-trough ratios ( $\log_2$  PTRs)  
406 were read into R version 4.1.3 for analysis<sup>67</sup>. All plots were generated using ggplot2<sup>73</sup>, unless  
407 indicated otherwise. BIO-ML donors were selected by retaining individuals with over 50  
408 metagenomic time points, resulting in four time series (i.e., donors ae, am, an, and ao). Distinct  
409 *Bacteroides ovatus* strains across all four donors contained duplicated taxon names with unique  
410 taxonomic identifiers, and were renamed to “*Bacteroides ovatus\_1*” and “*Bacteroides ovatus\_2*.”  
411 Raw read counts for a given taxon within a sample were centered log-ratio (CLR) transformed  
412<sup>74</sup>. Taxa that had matched  $\log_2$  PTR and CLR abundance information available across more than  
413 5 time points within an individual, with time differences between samples less than three days,  
414 were used in subsequent analyses. Changes in normalized abundance were calculated as  
415 *Abundance changes(delta) = x(t + 1) - x(t)*, where  $\Delta t < 3 \text{ days}$ . To assess the regression-to-  
416 the-mean effect, CLR-normalized abundances were plotted against deltas for each taxon, and  
417 the regression coefficients, aggregating all microbial taxa, were plotted as boxplots (showing  
418 median and interquartile range), summarized by donor.

419           For each donor, to estimate the growth phase of each individual taxon, we used linear  
420 regression of CLR-normalized abundances vs.  $\log_2$  PTRs, followed by a Benjamini-Hochberg p-  
421 value correction to control for the false discovery rate (FDR) in base R. Regression coefficients  
422 with FDR-adjusted p-values  $< 0.05$  were considered significant. Taxa with average  $\log_2$  PTRs  $<$   
423 0.358 (experimentally-determined stationary threshold) were designated as being in stationary  
424 phase. For those taxa not designated as being in stationary phase, significantly positive or  
425 negative associations between  $\log_2$  PTRs and abundances were considered to be in  
426 acceleration or deceleration phase, respectively. Those with no correlation and an average  
427  $\log_2$  PTR above the stationary threshold were constrained to be in mid-log phase or in  
428 acceleration/deceleration phase (i.e., if there was a false negative due to lack of statistical  
429 power in detecting a positive or negative slope). Linear regression was also used to test  
430 whether or not average CLR-normalized abundances and average  $\log_2$  PTRs were significantly

431 associated within each donor, and p-values from individual tests were combined using Fisher's  
432 method <sup>75</sup>.

433

#### 434 **Stochastic logistic growth model simulation**

435 The stochastic logistic growth equation (sLGE) was implemented as:  $\frac{dx_i}{dt} = rx_i(t) \left(1 - \frac{x_i(t)}{K}\right) +$   
436  $\sigma x_i(t)\omega(t)$ , where  $t$  is time,  $r$  is the growth rate,  $x_i$  is the abundance of taxon  $i$ ,  $K$  is the carrying  
437 capacity,  $\sigma$  is the noise magnitude term, and  $\omega(t)$  is the noise distribution term. Using the R  
438 package `sde` <sup>76</sup>, taxonomic growth was simulated with  $x_{i,0} = 1$ ,  $t_0 = 1$  to  $t_{final} = 100$ , for 100  
439 iterations. The other parameters were varied as described in the results and below. To  
440 investigate the impact of noise on sLGE trajectories, noise levels were set from 0.001 to 1, with  
441  $r$  and  $K$  ranging from 1 to 3 and 10 to 1000, respectively. To investigate the statistical  
442 relationships between deltas and abundances across growth phases and across model  
443 parameterizations, Pearson's R coefficients and p-values were calculated for each of the three  
444 growth phase categories. The growth phases for each model parameterization were defined  
445 using the non-stochastic logistic growth equation (LGE):  $\frac{dx_i}{dt} = rx_i(t) \left(1 - \frac{x_i(t)}{K}\right)$ , the solution for  
446 which can be written as  $x_i = \frac{x_{i,0}Ke^{rt}}{(K-x_{i,0})+x_{i,0}e^{rt}}$ .

447 The  $x_i$  values for each simulated time point from solving the LGE were used to calculate  
448 the first derivative (i.e., the growth rate), which is exactly equal to the LGE. The second  
449 derivative (i.e., growth acceleration),  $\frac{d^2x_i}{dt^2} = K^2x_i \left(1 - \frac{x_i}{K}\right) \left(1 - \left(\frac{2x_i}{K}\right)\right)$ , was calculated using  
450 solved  $x_i$  values. Growth phases from the sLGE were defined using the second derivative  
451 curves. First, the intersections of the acceleration curve and the half-max,  $a_1$  and  $a_2$ , and the  
452 half-min,  $a_3$  and  $a_4$ , were calculated (**Fig. S3**). The corresponding simulated time points of  $a_j$ ,  
453 denoted as  $s_j$ , where  $j = 1 - 4$ , were then used to define growth phases as follows: lag  
454 phase:  $t < s_1$ ; acceleration phase:  $s_1 < t < s_2$ ; log phase:  $s_2 < t < s_3$ ; deceleration phase:  $s_3 <$

455  $t < s_4$ ; and stationary phase:  $t > s_4$ . Here, lag and acceleration phases were combined, as these  
456 phases display similar delta-abundance relationships along the logistic growth curve.

457 Conceptual diagrams were created using BioRender.

458 Death or dilution terms were not explicitly added to the simulated sLGE models. Here,  
459 we discuss how death or dilution rates are equivalent to changing the carrying capacity term,  
460 which has no impact on our growth phase inferences. Analytically, a decrease in abundance at  
461 a given time can be represented as a fraction of the current abundance subtracted from the

462 LGE:  $\frac{dx_i}{dt} = rx_i(t) \left(1 - \frac{x_i(t)}{K}\right) - Hx_i(t)$ . Here,  $H$  is the “harvest rate”, which determines the

463 proportional decrease in each timepoint in the equation. At steady state,  $rx_i^*(t) \left(1 -$

464  $\frac{x_i^*(t)}{K}\right) - Hx_i^*(t) = 0$ , where  $x_i^*(t)$  represents the fixed point. Two equilibria exists in

465 this equation:  $x_i^*(t) = 0$  and  $x_i^*(t) = K\left(1 - \frac{H}{r}\right)$ , with the latter being asymptotically

466 stable. As  $H$  increases, the stable population size  $x_i^*(t)$  decreases due to the proportional

467 decrease in  $K$ . As long as  $H$  does not exceed the intrinsic growth rate of gut microbes, which is

468 expected for highly abundant and stably colonized taxa, the resulting  $K$  becomes the new stable

469  $K$ . To show that variation in  $k$  does not impact the relationship between growth rate and

470 abundance, we simulated the LGE with stochastically varying  $K$  by adding the stochastic term,

471 i.e.  $\sigma k_i(t)\omega(t)$ , to  $k_i(t)$  (**Fig. S4**). In base R, simulation was performed for 100 iterations with

472 the same noise levels ( $\sigma = 0.1$ ) as the representative sLGE simulations with stochastic  $x$ . Major

473 growth phases were defined the same way as sLGE simulations with stochastic  $x$ .

474

#### 475 **Data and code availability**

476 Nextflow pipelines implementing the processing of metagenomic shotgun sequencing data from

477 raw reads to taxonomic abundance matrices and PTR estimates can be found at

478 <https://github.com/Gibbons-Lab/pipelines/> (metagenomics pipelines). These DNA datasets are

479 publicly available from the National Center for Biotechnology (NCBI) Sequence Read Archive  
480 (SRA), accession code PRJNA942341. Scripts used to analyze the data, run the sLGE  
481 simulations, and produce the figures in the manuscript have been deposited at  
482 <https://github.com/Gibbons-Lab/human-microbiome-time-series-growth-phase-estimation>.

483

#### 484 **Acknowledgements**

485 We would like to thank Shijie Zhao for suggesting that we investigate PTR-abundance  
486 relationships in the BIO-ML data set. Thanks to Pamela Troisch for help with DNA library  
487 preparation for the *in vitro* experiment. We would also like to thank Nitin Baliga, Amy Willis, Julia  
488 Cui, and the members of the Gibbons Lab for helpful discussions of this work. SMG and CD  
489 were supported by a Washington Research Foundation Distinguished Investigator Award and  
490 by startup funds from the Institute for Systems Biology. JL was supported by the Environmental  
491 Pathology/Toxicology training grant (ES007032). Research reported in this publication was  
492 supported by the National Institute of Diabetes and Digestive and Kidney Diseases of the  
493 National Institutes of Health (NIH) under award number R01DK133468 (to SMG).

494

#### 495 **Conflict of Interest Statement**

496 The authors report no conflicts of interest.

497

#### 498 **References**

- 499 1. El Aidy, S., Hooiveld, G., Tremaroli, V., Bäckhed, F. & Kleerebezem, M. The gut microbiota  
500 and mucosal homeostasis: colonized at birth or at adulthood, does it matter? *Gut Microbes*  
501 **4**, 118–124 (2013).
- 502 2. Martin, A. M., Sun, E. W., Rogers, G. B. & Keating, D. J. The Influence of the Gut  
503 Microbiome on Host Metabolism Through the Regulation of Gut Hormone Release. *Front.*

- 504        *Physiol.* **10**, 428 (2019).
- 505    3. Zhang, P. *et al.* Commensal Homeostasis of Gut Microbiota-Host for the Impact of Obesity.  
506        *Front. Physiol.* **8**, 1122 (2017).
- 507    4. Stefan, K. L., Kim, M. V., Iwasaki, A. & Kasper, D. L. Commensal Microbiota Modulation of  
508        Natural Resistance to Virus Infection. *Cell* **183**, 1312–1324.e10 (2020).
- 509    5. Fischbach, M. A. Microbiome: Focus on Causation and Mechanism. *Cell* **174**, 785–790  
510        (2018).
- 511    6. Zmora, N. *et al.* Personalized Gut Mucosal Colonization Resistance to Empiric Probiotics Is  
512        Associated with Unique Host and Microbiome Features. *Cell* **174**, 1388–1405.e21 (2018).
- 513    7. Suez, J. *et al.* Post-Antibiotic Gut Mucosal Microbiome Reconstitution Is Impaired by  
514        Probiotics and Improved by Autologous FMT. *Cell* **174**, 1406–1423.e16 (2018).
- 515    8. Bullman, S. *et al.* Analysis of *Fusobacterium* persistence and antibiotic response in  
516        colorectal cancer. *Science* **358**, 1443–1448 (2017).
- 517    9. Halfvarson, J. *et al.* Dynamics of the human gut microbiome in inflammatory bowel disease.  
518        *Nat Microbiol* **2**, 17004 (2017).
- 519    10. Cuna, A., Morowitz, M. J., Ahmed, I., Umar, S. & Sampath, V. Dynamics of the preterm gut  
520        microbiome in health and disease. *Am. J. Physiol. Gastrointest. Liver Physiol.* **320**, G411–  
521        G419 (2021).
- 522    11. Fisher, C. K. & Mehta, P. Identifying keystone species in the human gut microbiome from  
523        metagenomic timeseries using sparse linear regression. *PLoS One* **9**, e102451 (2014).
- 524    12. Bashan, A. *et al.* Universality of human microbial dynamics. *Nature* **534**, 259–262 (2016).
- 525    13. Stein, R. R. *et al.* Ecological modeling from time-series inference: insight into dynamics and  
526        stability of intestinal microbiota. *PLoS Comput. Biol.* **9**, e1003388 (2013).
- 527    14. Faust, K., Lahti, L., Gonze, D., de Vos, W. M. & Raes, J. Metagenomics meets time series  
528        analysis: unraveling microbial community dynamics. *Curr. Opin. Microbiol.* **25**, 56–66  
529        (2015).

- 530 15. Gibbons, S. M., Kearney, S. M., Smillie, C. S. & Alm, E. J. Two dynamic regimes in the  
531 human gut microbiome. *PLoS Comput. Biol.* **13**, e1005364 (2017).
- 532 16. Carr, A., Diener, C., Baliga, N. S. & Gibbons, S. M. Use and abuse of correlation analyses  
533 in microbial ecology. *ISME J.* **13**, 2647–2655 (2019).
- 534 17. Momeni, B., Xie, L. & Shou, W. Lotka-Volterra pairwise modeling fails to capture diverse  
535 pairwise microbial interactions. *Elife* **6**, (2017).
- 536 18. Berry, D. & Widder, S. Deciphering microbial interactions and detecting keystone species  
537 with co-occurrence networks. *Front. Microbiol.* **5**, 219 (2014).
- 538 19. Freilich, M. A., Wieters, E., Broitman, B. R., Marquet, P. A. & Navarrete, S. A. Species co-  
539 occurrence networks: Can they reveal trophic and non-trophic interactions in ecological  
540 communities? *Ecology* **99**, 690–699 (2018).
- 541 20. Coenen, A. R. & Weitz, J. S. Limitations of Correlation-Based Inference in Complex Virus-  
542 Microbe Communities. *mSystems* **3**, (2018).
- 543 21. Korem, T. *et al.* Growth dynamics of gut microbiota in health and disease inferred from  
544 single metagenomic samples. *Science* **349**, 1101–1106 (2015).
- 545 22. Brown, C. T., Olm, M. R., Thomas, B. C. & Banfield, J. F. Measurement of bacterial  
546 replication rates in microbial communities. *Nat. Biotechnol.* **34**, 1256–1263 (2016).
- 547 23. Gibson, B., Wilson, D. J., Feil, E. & Eyre-Walker, A. The distribution of bacterial doubling  
548 times in the wild. *Proc. Biol. Sci.* **285**, (2018).
- 549 24. Monod, J. THE GROWTH OF BACTERIAL CULTURES. *Annu. Rev. Microbiol.* **3**, 371–394  
550 (1949).
- 551 25. Logistic stochastic growth models and applications. in *Handbook of the Logistic Distribution*  
552 419–419 (CRC Press, 1991).
- 553 26. Descheemaeker, L. & de Buyl, S. Stochastic logistic models reproduce experimental time  
554 series of microbial communities. *Elife* **9**, (2020).
- 555 27. Grilli, J. Macroecological laws describe variation and diversity in microbial communities.

- 556 *Nat. Commun.* **11**, 4743 (2020).
- 557 28. Lobry, J. R., Flandrois, J. P., Carret, G. & Pave, A. Monod's bacterial growth model  
558 revisited. *Bull. Math. Biol.* **54**, 117–122 (1992).
- 559 29. Fujikawa, H., Kai, A. & Morozumi, S. A new logistic model for bacterial growth. *Shokuhin*  
560 *Eiseigaku Zasshi* **44**, 155–160 (2003).
- 561 30. Baranyi, J., McClure, P. J., Sutherland, J. P. & Roberts, T. A. Modeling bacterial growth  
562 responses. *J. Ind. Microbiol.* **12**, 190–194 (1993).
- 563 31. Ho, P.-Y., Good, B. H. & Huang, K. C. Competition for fluctuating resources reproduces  
564 statistics of species abundance over time across wide-ranging microbiotas. *Elife* **11**, (2022).
- 565 32. Wolff, R., Shoemaker, W. & Garud, N. Ecological Stability Emerges at the Level of Strains  
566 in the Human Gut Microbiome. *mSystems* (2023) doi:10.1128/mbio.02502-22.
- 567 33. Poyet, M. *et al.* A library of human gut bacterial isolates paired with longitudinal multiomics  
568 data enables mechanistic microbiome research. *Nat. Med.* **25**, 1442–1452 (2019).
- 569 34. Kadosh, E. *et al.* The gut microbiome switches mutant p53 from tumour-suppressive to  
570 oncogenic. *Nature* **586**, 133–138 (2020).
- 571 35. Kolodziejczyk, A. A., Zheng, D., Shibolet, O. & Elinav, E. The role of the microbiome in  
572 NAFLD and NASH. *EMBO Mol. Med.* **11**, (2019).
- 573 36. Day, J. A. *et al.* Lettuce (*Lactuca sativa*) productivity influenced by microbial inocula under  
574 nitrogen-limited conditions in aquaponics. *PLoS One* **16**, e0247534 (2021).
- 575 37. Levy, R. & Borenstein, E. Metabolic modeling of species interaction in the human  
576 microbiome elucidates community-level assembly rules. *Proc. Natl. Acad. Sci. U. S. A.* **110**,  
577 12804–12809 (2013).
- 578 38. Otwell, A. E. *et al.* Sulfur Metabolites Play Key System-Level Roles in Modulating  
579 Denitrification. *mSystems* **6**, (2021).
- 580 39. Wallace, R. J., Snelling, T. J., McCartney, C. A., Tapio, I. & Strozzi, F. Application of meta-  
581 omics techniques to understand greenhouse gas emissions originating from ruminal

- 582 metabolism. *Genet. Sel. Evol.* **49**, 9 (2017).
- 583 40. Roy, P., Dutta, A. & Deen, B. Greenhouse gas emissions and production cost of ethanol  
584 produced from biosyngas fermentation process. *Bioresour. Technol.* **192**, 185–191 (2015).
- 585 41. Zhong, C. Industrial-Scale Production and Applications of Bacterial Cellulose. *Front Bioeng*  
586 *Biotechnol* **8**, 605374 (2020).
- 587 42. Guzman-Rodriguez, M. *et al.* Using bioreactors to study the effects of drugs on the human  
588 microbiota. *Methods* **149**, 31–41 (2018).
- 589 43. Wilson, A. S. *et al.* Diet and the Human Gut Microbiome: An International Review. *Dig. Dis.*  
590 *Sci.* **65**, 723–740 (2020).
- 591 44. Dahl, W. J., Rivero Mendoza, D. & Lambert, J. M. Diet, nutrients and the microbiome. *Prog.*  
592 *Mol. Biol. Transl. Sci.* **171**, 237–263 (2020).
- 593 45. Baird, J. *et al.* The effect of a behaviour change intervention on the diets and physical  
594 activity levels of women attending Sure Start Children's Centres: results from a complex  
595 public health intervention. *BMJ Open* **4**, e005290–e005290 (2014).
- 596 46. Vangay, P. *et al.* US Immigration Westernizes the Human Gut Microbiome. *Cell* **175**, 962–  
597 972.e10 (2018).
- 598 47. David, L. A. *et al.* Diet rapidly and reproducibly alters the human gut microbiome. *Nature*  
599 **505**, 559–563 (2014).
- 600 48. David, L. A. *et al.* Host lifestyle affects human microbiota on daily timescales. *Genome Biol.*  
601 **15**, R89 (2014).
- 602 49. Blätke, M.-A. & Bräutigam, A. Evolution of C4 photosynthesis predicted by constraint-based  
603 modelling. *Elife* **8**, (2019).
- 604 50. Atolia, E. *et al.* Environmental and Physiological Factors Affecting High-Throughput  
605 Measurements of Bacterial Growth. *MBio* **11**, (2020).
- 606 51. Nguyen, J., Lara-Gutiérrez, J. & Stocker, R. Environmental fluctuations and their effects on  
607 microbial communities, populations and individuals. *FEMS Microbiol. Rev.* **45**, (2021).



- 608 52. Tsoularis, A. & Wallace, J. Analysis of logistic growth models. *Math. Biosci.* **179**, 21–55  
609 (2002).
- 610 53. O’Sullivan, O. *et al.* Exercise and the microbiota. *Gut Microbes* **6**, 131–136 (2015).
- 611 54. Joseph, T. A., Chlenski, P., Litman, A., Korem, T. & Pe’er, I. Accurate and robust inference  
612 of microbial growth dynamics from metagenomic sequencing reveals personalized growth  
613 rates. *Genome Res.* **32**, 558–568 (2022).
- 614 55. Long, A. M., Hou, S., Ignacio-Espinoza, J. C. & Fuhrman, J. A. Benchmarking microbial  
615 growth rate predictions from metagenomes. *ISME J.* **15**, 183–195 (2021).
- 616 56. Szafrńska, A. K., Junker, V., Steglich, M. & Nübel, U. Rapid cell division of  
617 *Staphylococcus aureus* during colonization of the human nose. *BMC Genomics* **20**, 229  
618 (2019).
- 619 57. Gao, Y. & Li, H. Quantifying and comparing bacterial growth dynamics in multiple  
620 metagenomic samples. *Nat. Methods* **15**, 1041–1044 (2018).
- 621 58. Johnson, J. P. *et al.* Generally-healthy individuals with aberrant bowel movement  
622 frequencies show enrichment for microbially-derived blood metabolites associated with  
623 impaired kidney function. *bioRxiv* 2023.03.04.531100 (2023)  
624 doi:10.1101/2023.03.04.531100.
- 625 59. Braga, R. M., Dourado, M. N. & Araújo, W. L. Microbial interactions: ecology in a molecular  
626 perspective. *Braz. J. Microbiol.* **47 Suppl 1**, 86–98 (2016).
- 627 60. Zelezniak, A. *et al.* Metabolic dependencies drive species co-occurrence in diverse  
628 microbial communities. *Proc. Natl. Acad. Sci. U. S. A.* **112**, 6449–6454 (2015).
- 629 61. Orth, J. D., Thiele, I. & Palsson, B. Ø. What is flux balance analysis? *Nat. Biotechnol.* **28**,  
630 245–248 (2010).
- 631 62. Pramanik, J. & Keasling, J. D. Stoichiometric model of *Escherichia coli* metabolism:  
632 incorporation of growth-rate dependent biomass composition and mechanistic energy  
633 requirements. *Biotechnol. Bioeng.* **56**, 398–421 (1997).

- 634 63. Dikicioglu, D., Kirdar, B. & Oliver, S. G. Biomass composition: the 'elephant in the room' of  
635 metabolic modelling. *Metabolomics* **11**, 1690–1701 (2015).
- 636 64. Schulz, C., Kumelj, T., Karlsen, E. & Almaas, E. Genome-scale metabolic modelling when  
637 changes in environmental conditions affect biomass composition. *PLoS Comput. Biol.* **17**,  
638 e1008528 (2021).
- 639 65. Diener, C., Gibbons, S. M. & Resendis-Antonio, O. MICOM: Metagenome-Scale Modeling  
640 To Infer Metabolic Interactions in the Gut Microbiota. *mSystems* **5**, (2020).
- 641 66. Adrian Trapletti, K. H. tseries: Time Series Analysis and Computational Finance. Preprint at  
642 <https://CRAN.R-project.org/package=tseries> (2022).
- 643 67. Team, R. C. R: A language and environment for statistical computing. R Foundation for  
644 Statistical Computing Vienna Austria URL (2022).
- 645 68. Chen, S., Zhou, Y., Chen, Y. & Gu, J. fastp: an ultra-fast all-in-one FASTQ preprocessor.  
646 *Bioinformatics* **34**, i884–i890 (2018).
- 647 69. Wood, D. E., Lu, J. & Langmead, B. Improved metagenomic analysis with Kraken 2.  
648 *Genome Biol.* **20**, 257 (2019).
- 649 70. Lu, J., Breitwieser, F. P., Thielen, P. & Salzberg, S. L. Bracken: estimating species  
650 abundance in metagenomics data. *PeerJ Comput. Sci.* **3**, e104 (2017).
- 651 71. Nayfach, S., Shi, Z. J., Seshadri, R., Pollard, K. S. & Kyrpides, N. C. New insights from  
652 uncultivated genomes of the global human gut microbiome. *Nature* **568**, 505–510 (2019).
- 653 72. Langmead, B., Wilks, C., Antonescu, V. & Charles, R. Scaling read aligners to hundreds of  
654 threads on general-purpose processors. *Bioinformatics* **35**, 421–432 (2019).
- 655 73. Wickham, H. *ggplot2: Elegant Graphics for Data Analysis*. (Springer, 2016).
- 656 74. Lin, H. & Peddada, S. D. Analysis of microbial compositions: a review of normalization and  
657 differential abundance analysis. *NPJ Biofilms Microbiomes* **6**, 60 (2020).
- 658 75. Fisher, S. R. A. *Statistical Methods for Research Workers*. (Oliver and Boyd, 1925).
- 659 76. Iacus, S. M. SDE : simulation and inference for stochastic differential equations. (2007).

660

661 **FIGURE LEGENDS**

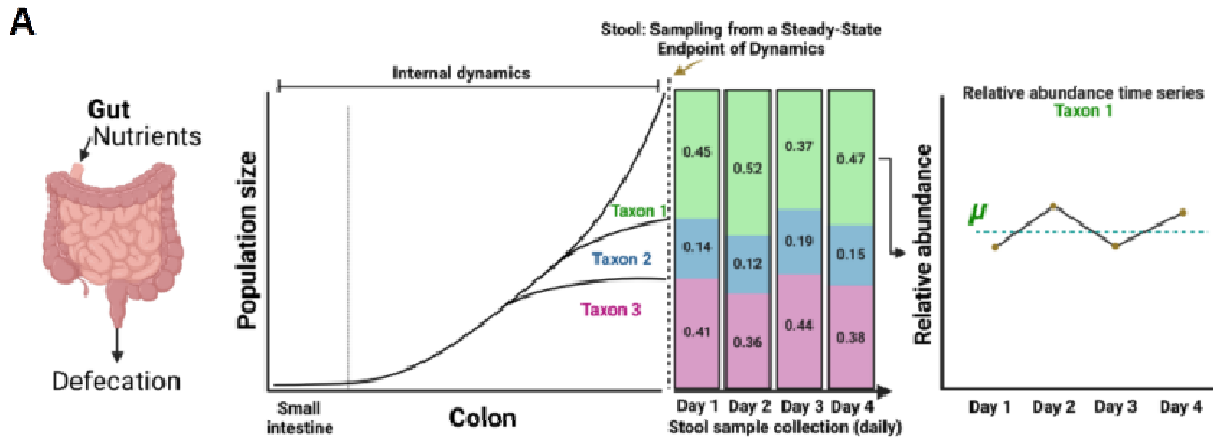

**B** **4 healthy human donors longitudinal fecal microbiome collection**

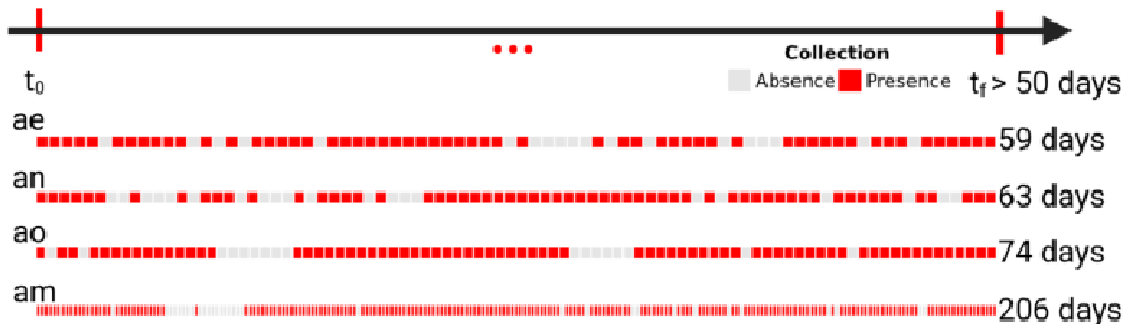

662

663 **Figure 1. Conceptual figure showing two flow-through microbial ecosystems: a**  
 664 **bioreactor and a human gut. A.** Both bioreactors and guts are continuous flow-through  
 665 systems. Prior to reaching the measured abundances in stool, taxa grow in the large intestine  
 666 with varying growth rates, carrying capacities, and steady-state population sizes, which may be  
 667 in different growth phases at the time of measurement. For example, see dynamics for Taxa 1-  
 668 3. Daily stool collections show variation in abundances, but this variation likely does not reflect  
 669 internal growth dynamics in the gut. **B.** Healthy BIO-ML stool donors (subject IDs: ae, am, an,  
 670 and ao) with samples collected 3-5 days per week for a total of >50 time points. Red indicates  
 671 presence of shotgun metagenomic sequencing data and gray represents absence of  
 672 metagenomic data from consecutive daily time points.

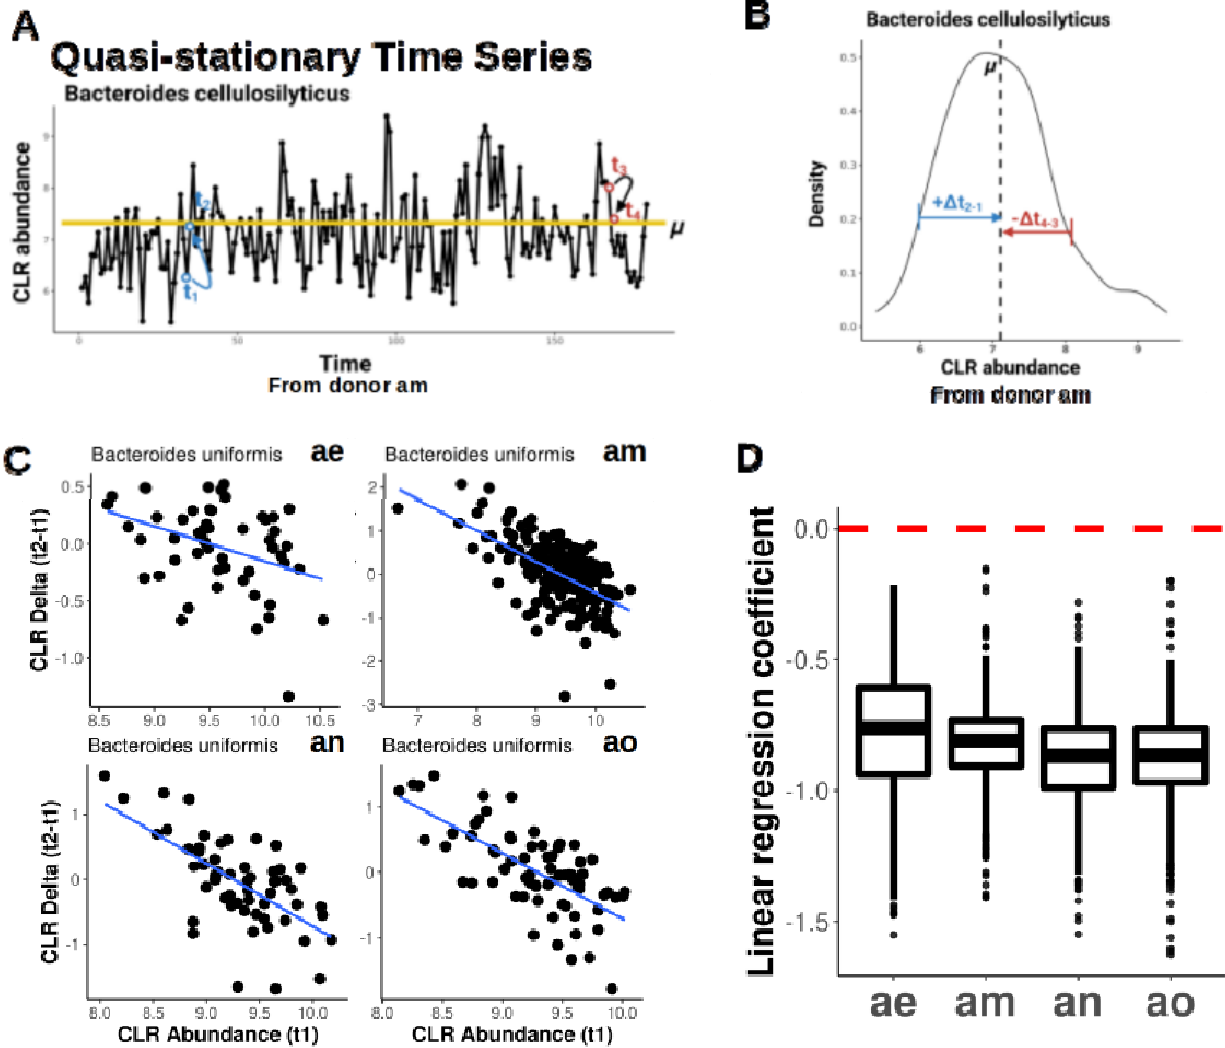

673

674 **Figure 2. Regression-to-the-mean effect in human microbial time series data.** A. Yellow  
675 line represents the mean abundance ( $\mu$ ) of *Bacteroides cellulosilyticus* over time in donor am.  
676 Time points  $t_1$  and  $t_3$  indicate fluctuations below and above the mean abundance, and  $t_2$  and  $t_4$   
677 show the return to the mean abundance. B. Distribution of time series delta values (e.g.,  $t_2-t_1$ )  
678 for *Bacteroides cellulosilyticus* in donor am, which is approximately normally distributed. C.  
679 Delta vs. abundance for *Bacteroides uniformis* time series from donors ae, am, an, and ao. D.  
680 Boxplots (showing median and interquartile range) of linear regression coefficients for deltas vs.  
681 abundances across all taxa time series in all four donors. Red line indicates a regression  
682 coefficient of 0.

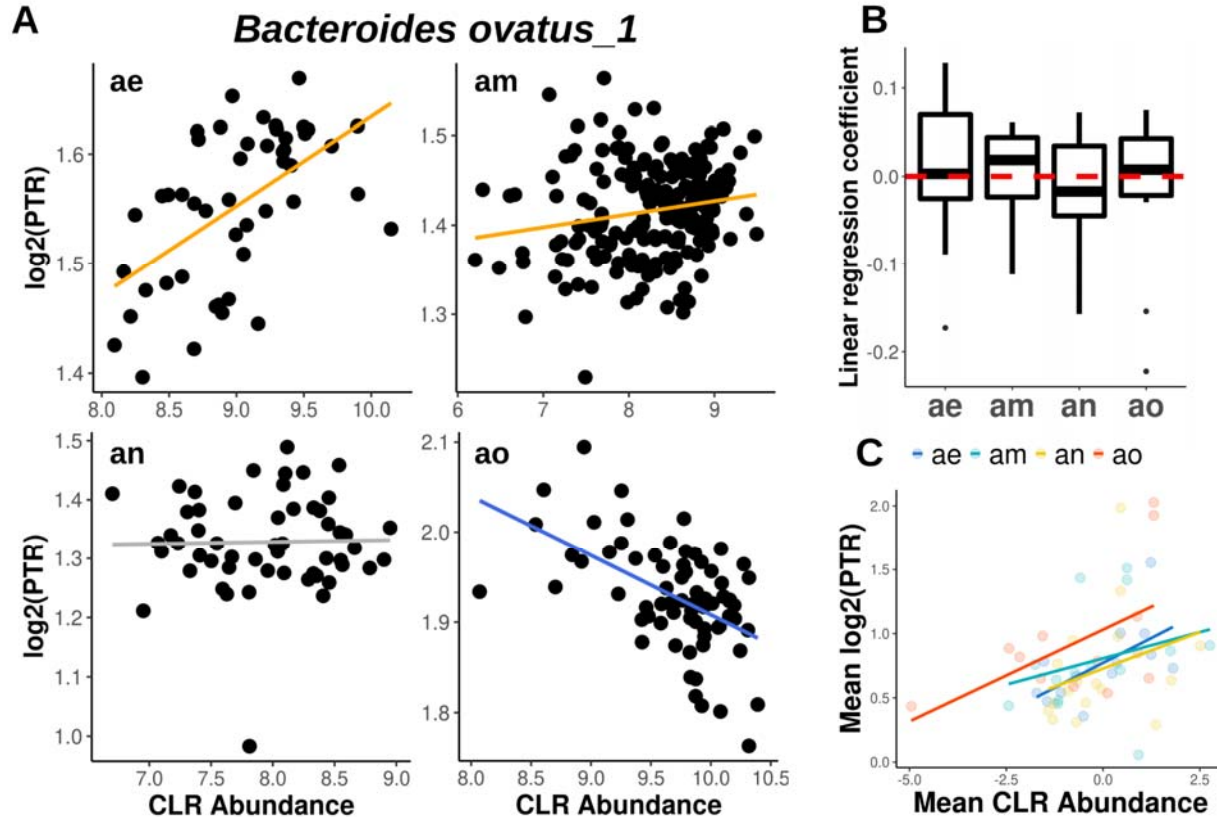

683  
684 **Figure 3. Variable relationships between PTRs and CLR-normalized abundances across**  
685 **human gut microbial time series.** The ratio of sequencing coverage near the replication origin  
686 to the replication terminus for each species (i.e. peak-to-trough ratio, or PTR), was calculated  
687 using COPTR. **A.** Log<sub>2</sub>(PTR) and CLR-normalized abundance relationships for donors ae, am,  
688 an, and ao. Orange and blue lines show significantly positive and negative linear regression  
689 coefficients (linear regression, FDR adjusted *p*-value < 0.05), respectively. Gray lines indicate  
690 no statistically significant association. **B.** Boxplots (showing median and interquartile range) of  
691 linear regression coefficient combined for all filtered taxa for each donor. **C.** Mean log<sub>2</sub>(PTR)  
692 and mean CLR-normalized abundance for all abundant taxa in each donor (*p*-values for  
693 regressions run within each donor were combined using Fisher's method; combined *p*-value =  
694 0.005). PTR was calculated.

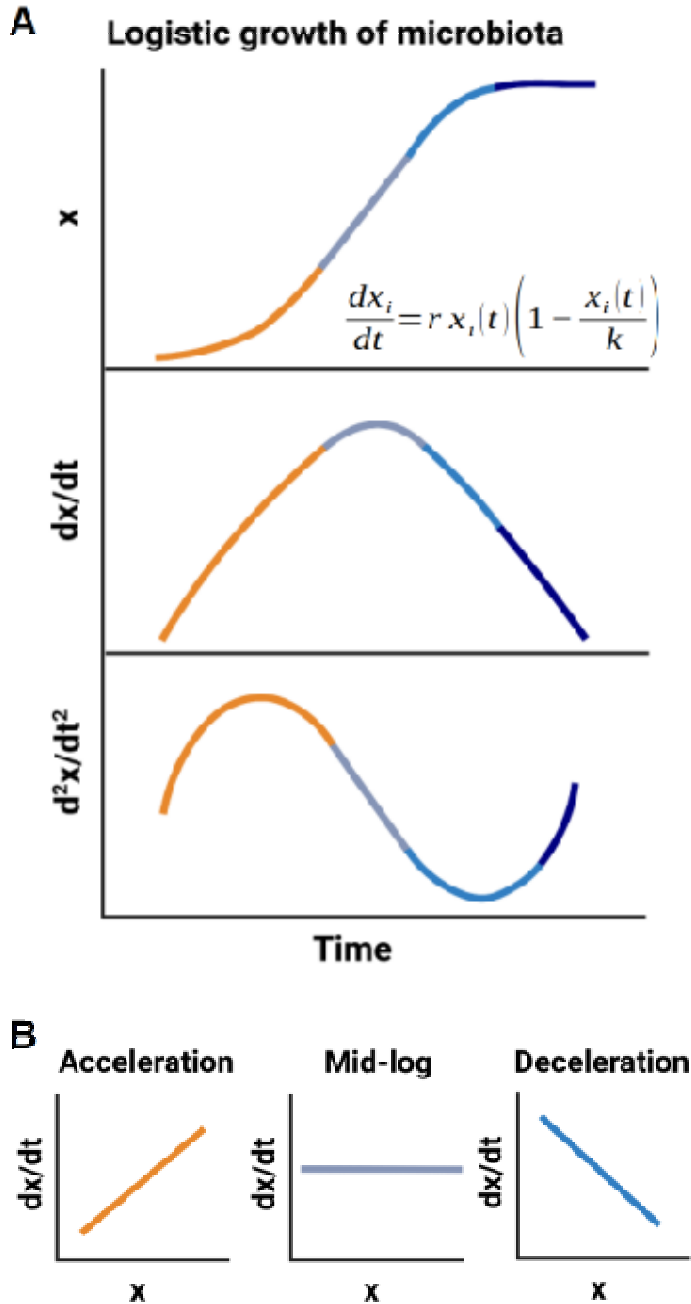

695

696 **Figure 4. Diagram of the logistic growth equation.** **A.** The logistic growth curve models  
697 abundance ( $x$ ) with respect to time (top panel). Orange, grey, blue, and navy describes  
698 acceleration, mid-log, deceleration, and stationary phases, respectively. The first derivative of  
699 the logistic growth curve models the growth rate with respect to time (middle panel). The second  
700 derivative of the logistic growth curve models growth rate acceleration with respect to time  
701 (bottom panel). **B.** Expected relationships between abundance and growth rate at different  
702 locations along the logistic growth curve.

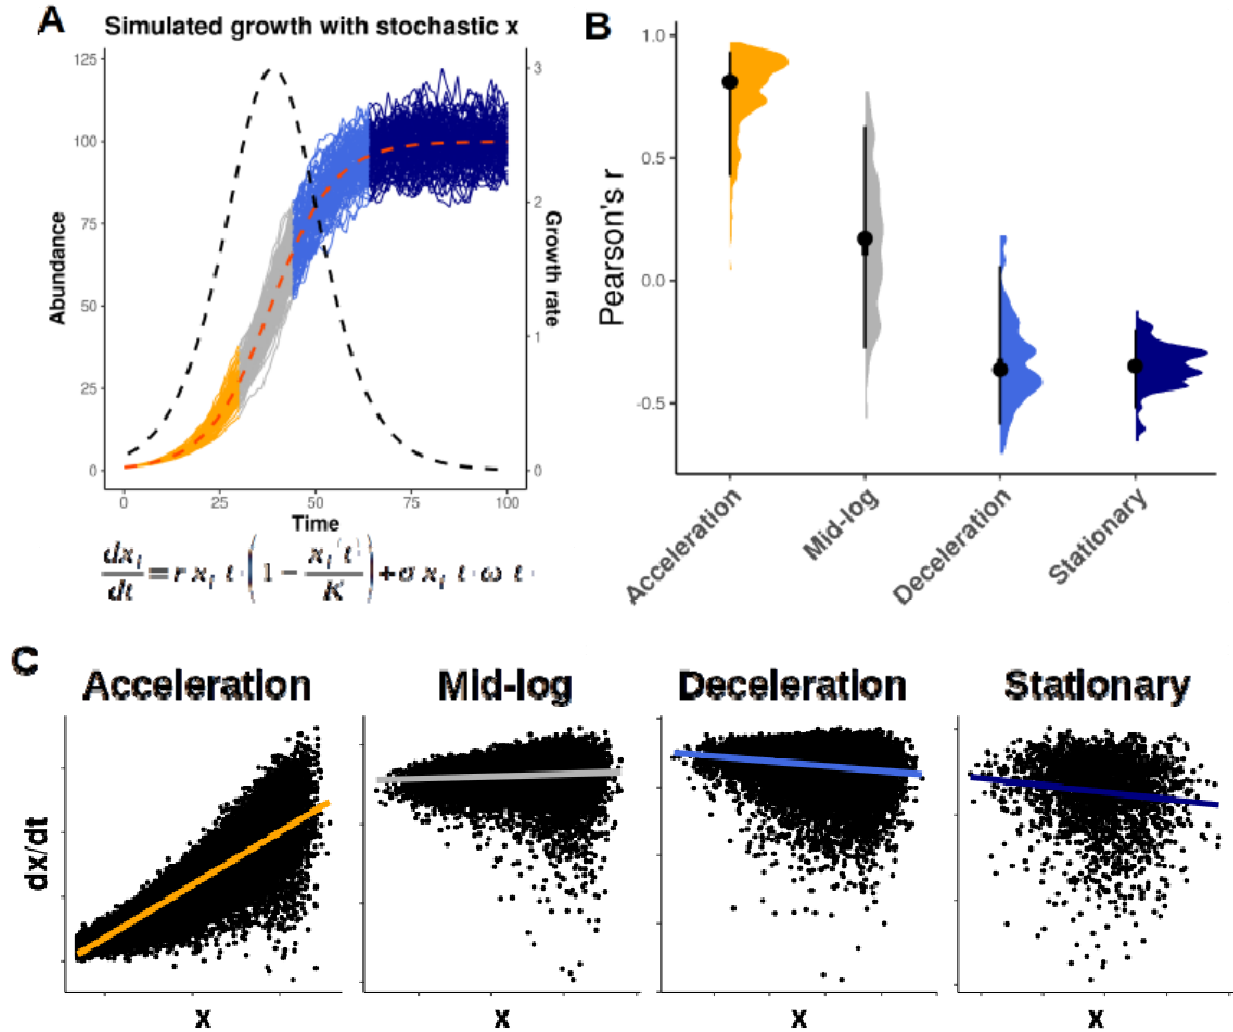

703  
 704 **Figure 5. Distinguishing growth phases using the stochastic logistic growth model. A.**  
 705 Stochastic logistic growth curves with growth rate ( $r = 1.2$ , carrying capacity ( $k = 100$ , and  
 706 noise level ( $n = 0.1$ ) across 100 iterations. Major growth phase groups in orange (acceleration),  
 707 gray (mid-log), blue (deceleration), and navy (stationary). **B.** Pearson r values between  
 708 abundances and growth rates in each of the four growth phase windows across variable model  
 709 parameterizations ( $r = 1-3$ ,  $k = 10-1000$ ) and a fixed noise level ( $\sigma = 0.1$ ). **C.** Scatter plots in log  
 710 scale showing relationships between abundance and growth rate across the four growth phase  
 711 regions defined in panel A.

712



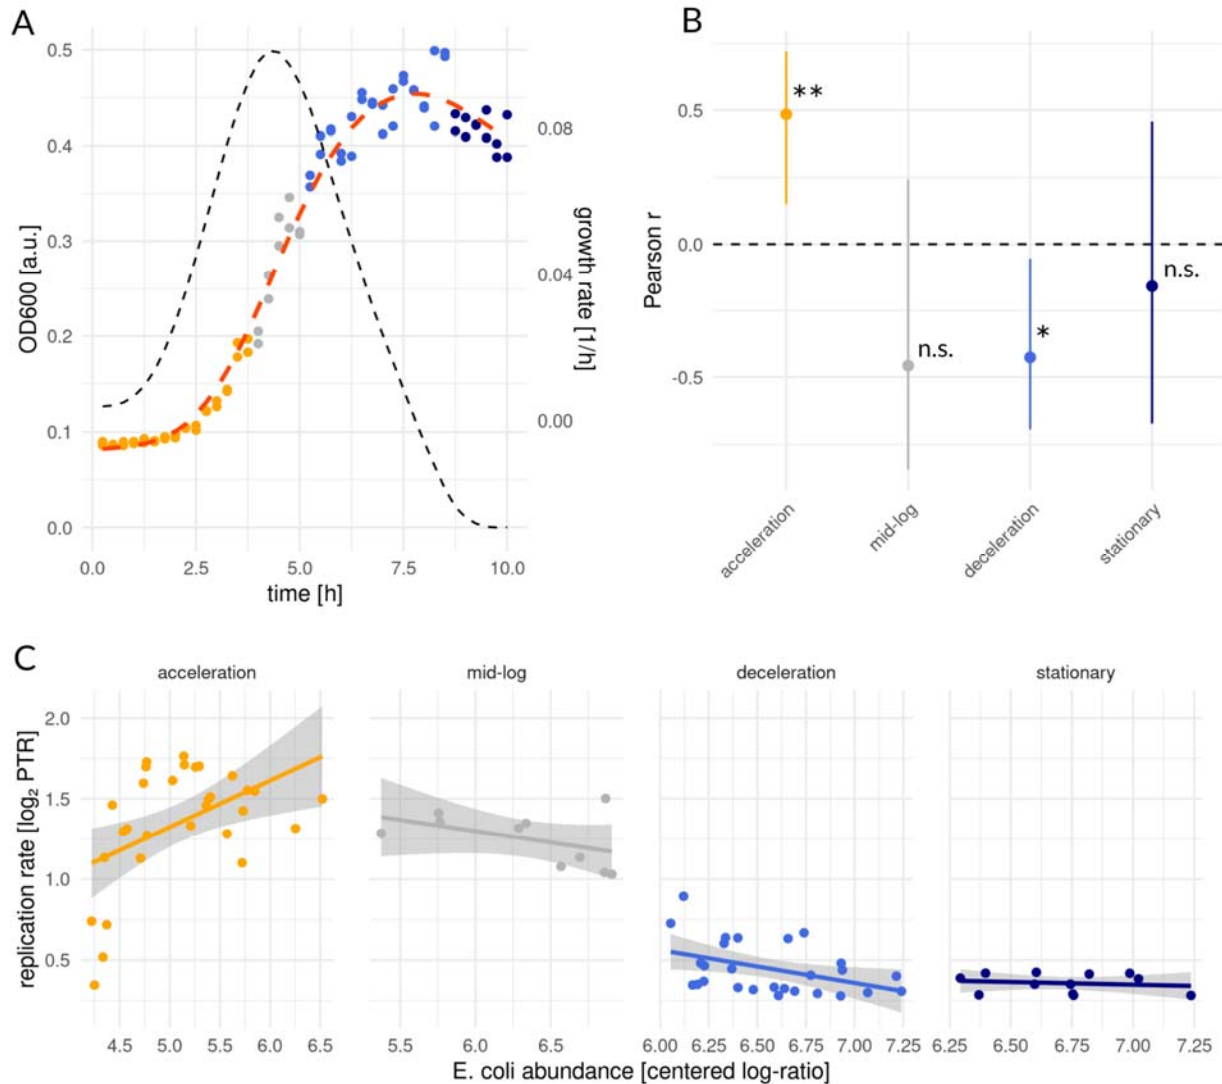

713

714 **Figure 6. Relationship between growth rate and abundance in major growth phases in *E.***  
715 ***coli* populations. A.** Growth curve of *E. coli* (MG1655) using OD measurements. Colors  
716 describe major growth phases. Dotted black and red lines show the growth rate derived from  
717 OD measurements and mean growth trajectory, respectively. **B.** Pearson  $r$  values between  
718 abundance and growth rate in each of the four growth phase windows. Asterisks show statistical  
719 significance. \*\*:  $p < 0.01$ , \*:  $p < 0.05$ , n.s.: not significant. **C.** Scatter plots in log scale showing  
720 relationships between abundance and replication rate ( $\log_2$ PTR) across the four growth phase  
721 regions defined in panel A.



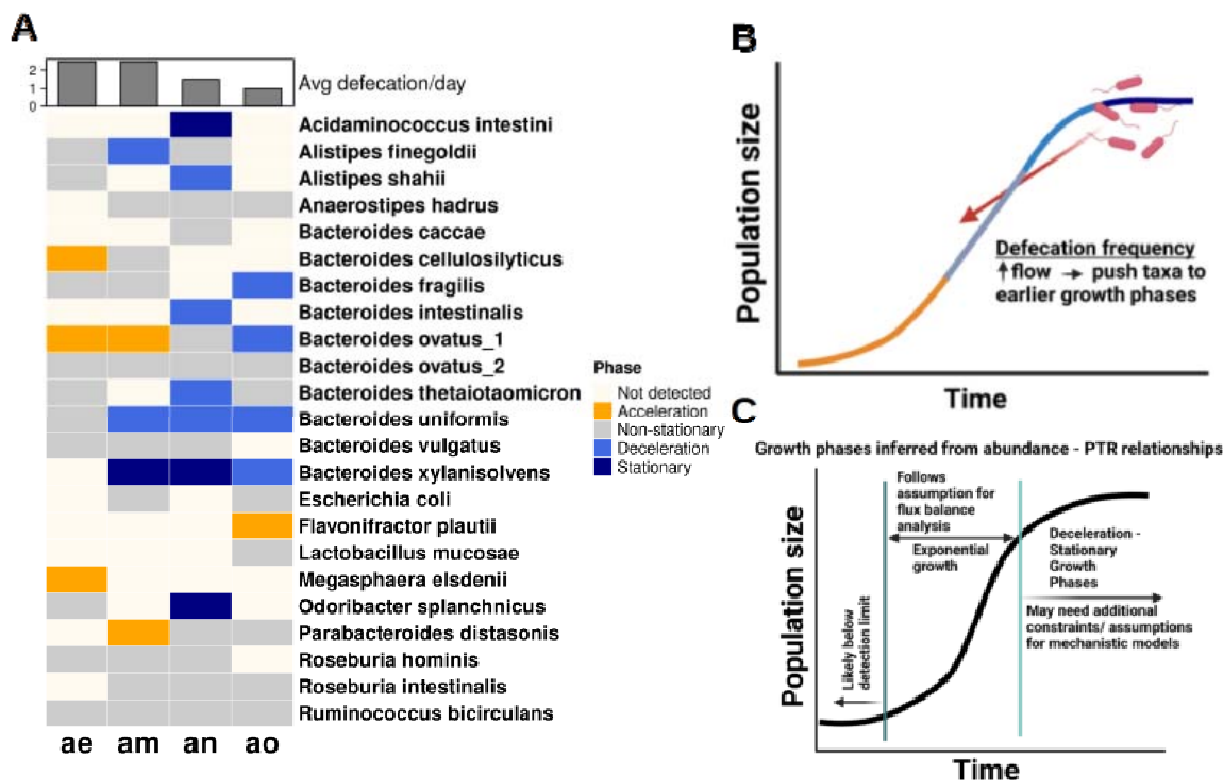

722  
 723 **Figure 7. *in vivo* growth phase estimation.** **A.** We find variable relationships between  
 724  $\log_2$ PTRs and population abundances across taxa in each of the four donors, consistent with  
 725 the growth phase patterns observed in sLGE simulations. Donors with higher defecation rates  
 726 tended to have a larger fraction taxa with positive  $\log_2$ PTR-abundance associations and fewer  
 727 with negative associations, indicating acceleration and deceleration-stationary phases,  
 728 respectively. Taxa in stationary phase were classified using an empirical threshold (average  
 729  $\log_2$ PTR < 0.358). Non-stationary taxa (i.e., above the stationary phase threshold, but lacking a  
 730 significant correlation between  $\log_2$ PTRs and abundances) are likely in mid-log phase, but these  
 731 taxa could also be in acceleration/deceleration phases (i.e., underpowered to detect the  
 732 correlation). **B.** We suggest that higher defecation rates (i.e., higher dilution rates) push  
 733 bacterial populations towards earlier growth phases, which is consistent with our results in panel  
 734 **A.** **C.** Growth phase estimates can be leveraged to identify taxa that are more-or-less amenable  
 735 to metabolic modeling techniques, such as Flux Balance Analysis, which assumes exponential  
 736 growth.

737

738

739

740

741

742 **Supplemental Figures**

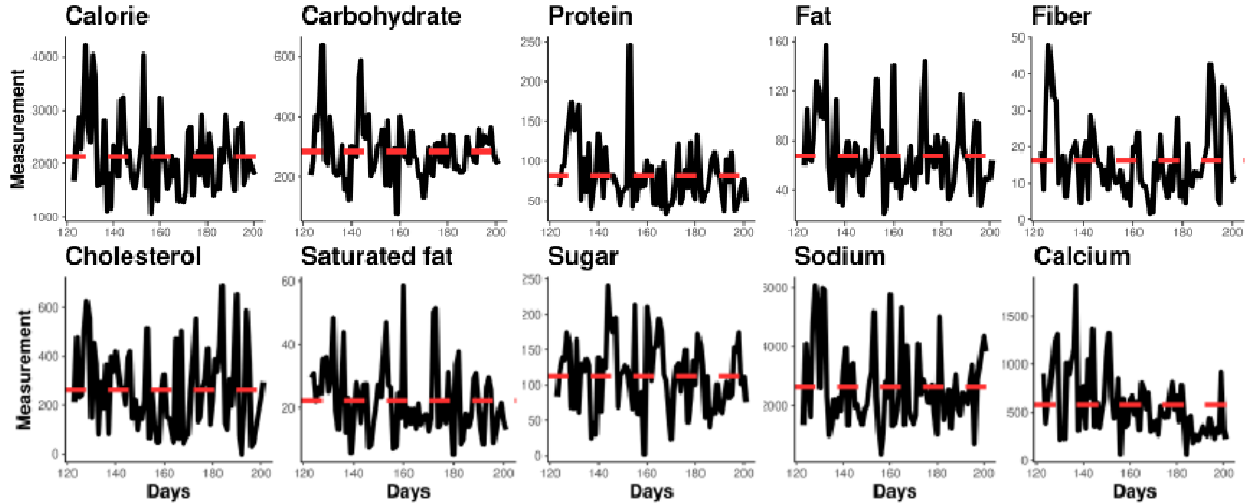

743 **Figure S1. Lack of autocorrelation detected in most daily macronutrient intake.** Daily  
744 measurements of nutrient intake were downloaded from David et al. <sup>48</sup>. Post-travel time points  
745 are shown. Autocorrelation was tested using the augmented Dickey-Fuller test (i.e.,  $p < 0.1$   
746 indicates significant stationarity of a dietary variable). For each nutrient, p-values are reported  
747 for the recordings post-travel period of the subject. Calorie ( $p = 0.0341$ ), carbohydrate ( $p =$   
748  $0.0144$ ), protein ( $p = 0.0314$ ), fat ( $p = 0.0172$ ), fiber ( $p = 0.0369$ ), cholesterol ( $p = 0.0534$ ),  
749 saturated fat ( $p < 0.01$ ), sugar ( $p = 0.0123$ ), sodium ( $p = 0.0341$ ), calcium ( $p < 0.01$ ). Dotted red  
750 lines show the mean measurement values.  
751

752

753

754

755

756

757

758

759

760

761

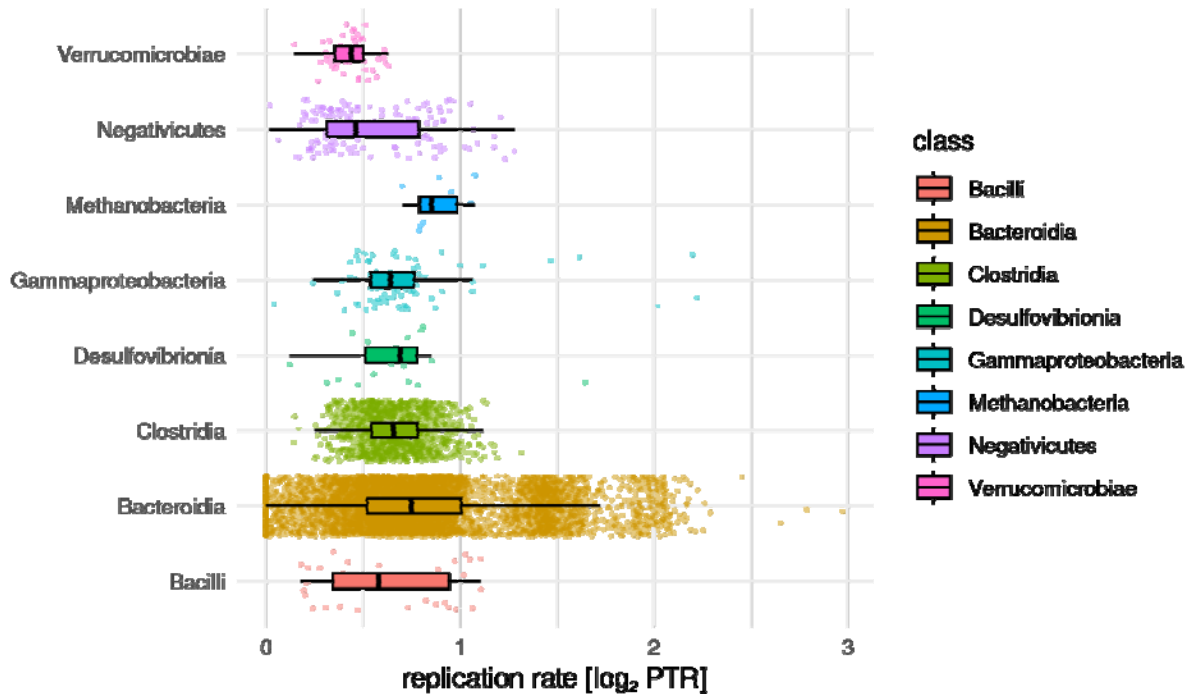

762

763

764

765

766

767

768

769

769

770

771

771

772

772

773

773

774

774

775

775

776

776

777

777

**Figure S2. Distributions of log<sub>2</sub>PTR values across 84 BIO-ML donors, broken down by phylogenetic class.** We see a fairly wide range of log<sub>2</sub>PTRs within each taxonomic class. The median log<sub>2</sub>PTR across classes varies between ~0.45 and ~0.75. In a linear regression model, controlling from taxonomic group as a covariate, we see a significant positive association between log<sub>2</sub>PTRs and CLR abundances at the class-level ( $\beta = 0.0612$ ,  $p = 8.359e^{-60}$ ). This positive taxonomy-controlled association is preserved at the species-level ( $\beta = 0.0101$ ,  $p = 0.0006$ ).

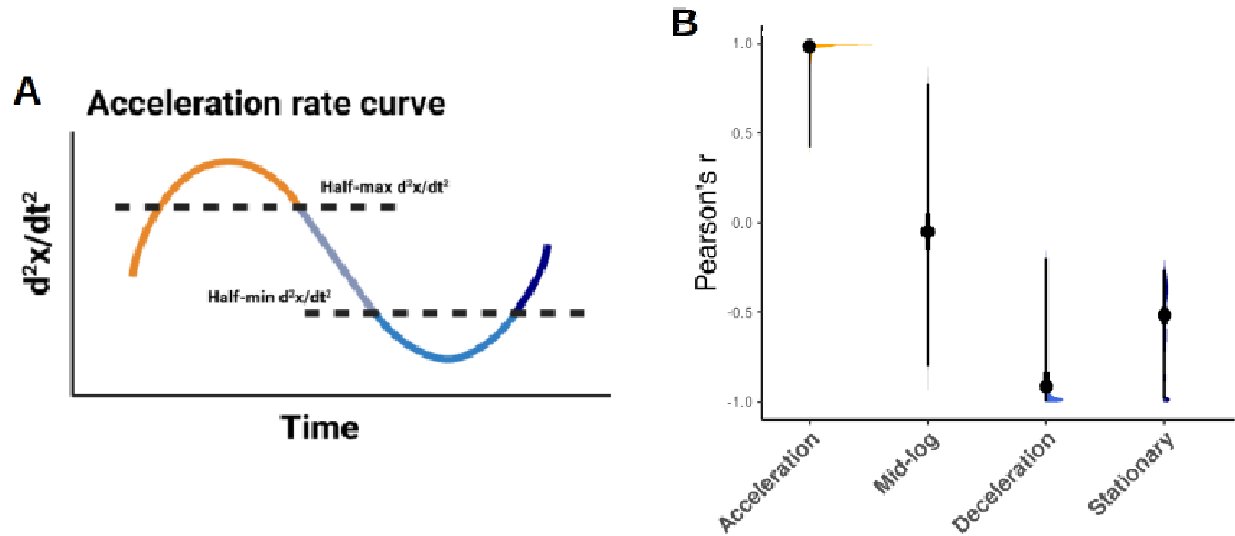

778

779 **Figure S3. Definition of major growth phases using the stochastic logistic growth model.**

780 **A.** The half-maximum of the peak and half-minimum of the trough of the second derivative of  
781 abundance were used to define growth phases across model parameterizations. **B.** Pearson r  
782 values between abundances and growth rates in the three growth phase categories obtained  
783 from combined sLGE simulation results across a range of growth rates ( $r = 1-3$ ), carrying  
784 capacities ( $k = 10-1000$ ), and noise levels ( $n = 0.001-1$ ).

785

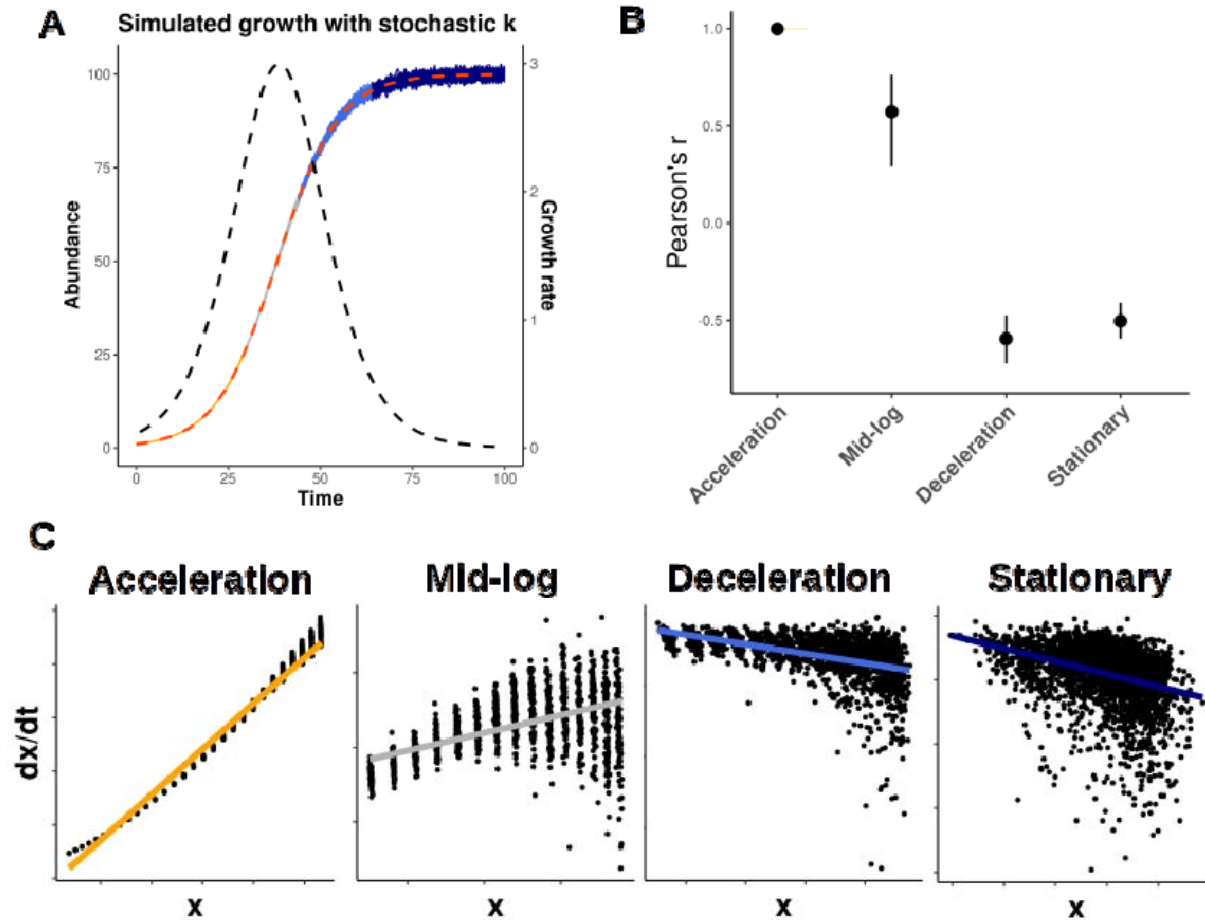

786

787

788 **Figure S4. Relationship between growth rate and abundance across the major growth**

789 **phases, simulated using the logistic growth model with stochastically varying carrying**

790 **capacities. A.** Stochastic logistic growth curves with growth rate ( $r = 1.2$ , carrying capacity ( $k$ )

791  $= 100$ , and noise level ( $n = 0.1$ ) applied to  $k$  across 100 iterations. Major growth phase groups in

792 orange (acceleration), gray (mid-log), blue (deceleration), and navy (stationary). **B.** Pearson  $r$

793 values between abundances and growth rates in each of the four growth phase windows across

794 variable model parameterizations ( $r = 1-3$ ,  $k = 10-1000$ ) and a fixed noise level ( $n = 0.1$ ). **C.**

795 Scatter plots in log scale showing relationships between abundance and growth rate across the

four growth phase regions defined in panel A.

796

797

## Donor ae

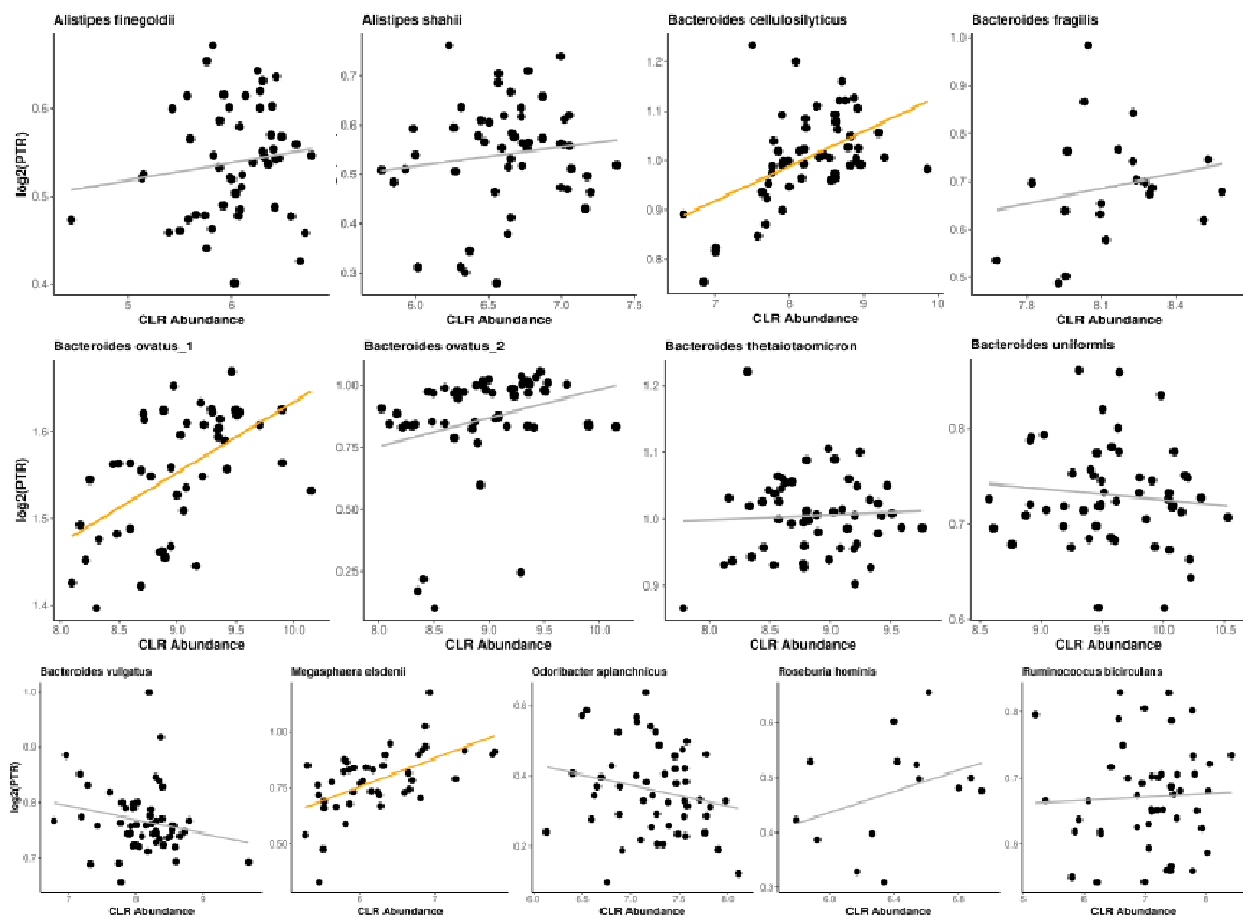

798  
799 **Figure S5. Relationships between abundance and log<sub>2</sub>(PTR) for abundant taxa in donor**  
800 **ae.** Abundant taxa with relatively dense longitudinal PTR and abundance data (at least 5  
801 matched data points; time differences between adjacent samples less than three days) were  
802 selected for analysis. Gray trend lines show no significant correlations, orange trend lines  
803 indicate significant positive correlations, and blue trend lines represent significant negative  
804 correlations (linear regression, BH-FDR < 0.05).

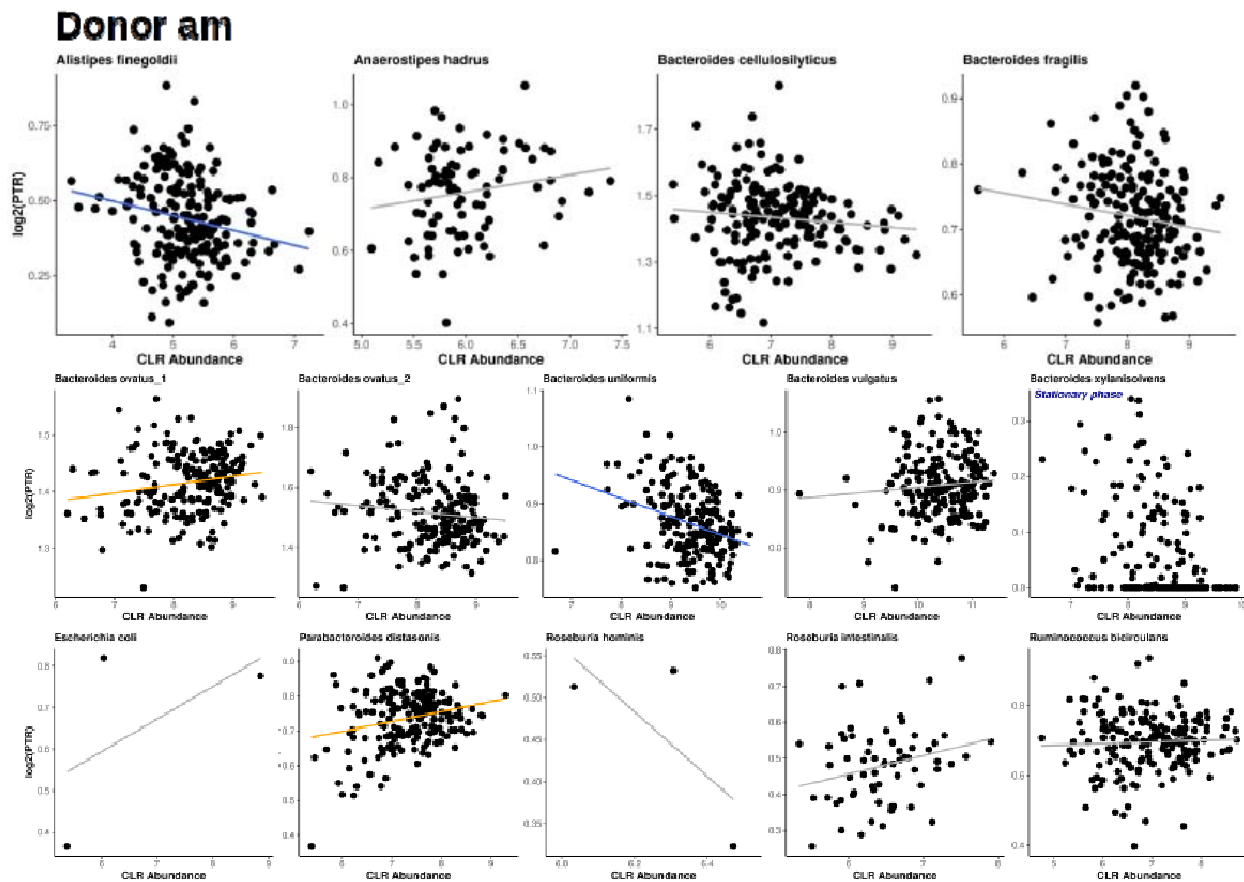

805  
806 **Figure S6. Relationships between abundance and log<sub>2</sub>(PTR) for abundant taxa in donor**  
807 **am.** Abundant taxa with relatively dense longitudinal PTR and abundance data (at least 5  
808 matched data points; time differences between adjacent samples less than three days) were  
809 selected for analysis. Gray trend lines show no significant correlations, orange trend lines  
810 indicate significant positive correlations, and blue trend lines represent significant negative  
811 correlations (linear regression, BH-FDR < 0.05).

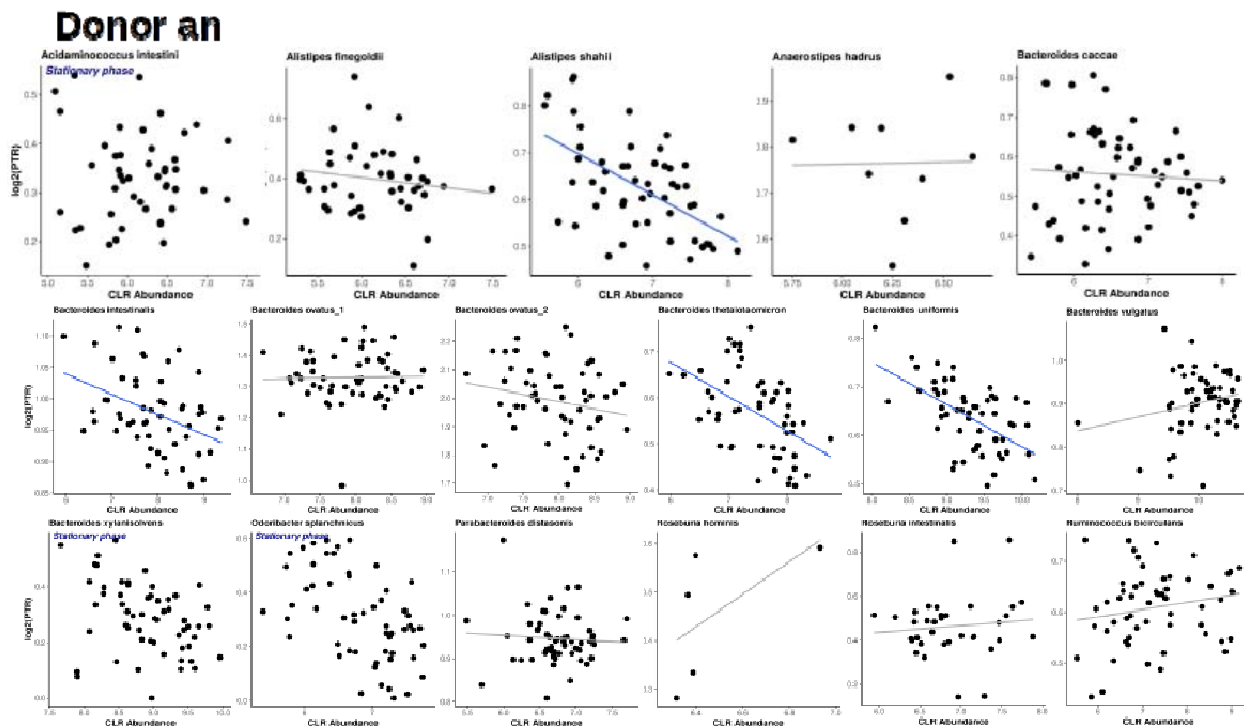

812  
813 **Figure S7. Relationships between abundance and log<sub>2</sub>(PTR) for abundant taxa in donor**  
814 **an.** Abundant taxa with relatively dense longitudinal PTR and abundance data (at least 5  
815 matched data points; time differences between adjacent samples less than three days) were  
816 selected for analysis. Gray trend lines show no significant correlations, orange trend lines  
817 indicate significant positive correlations, and blue trend lines represent significant negative  
818 correlations (linear regression, BH-FDR < 0.05).



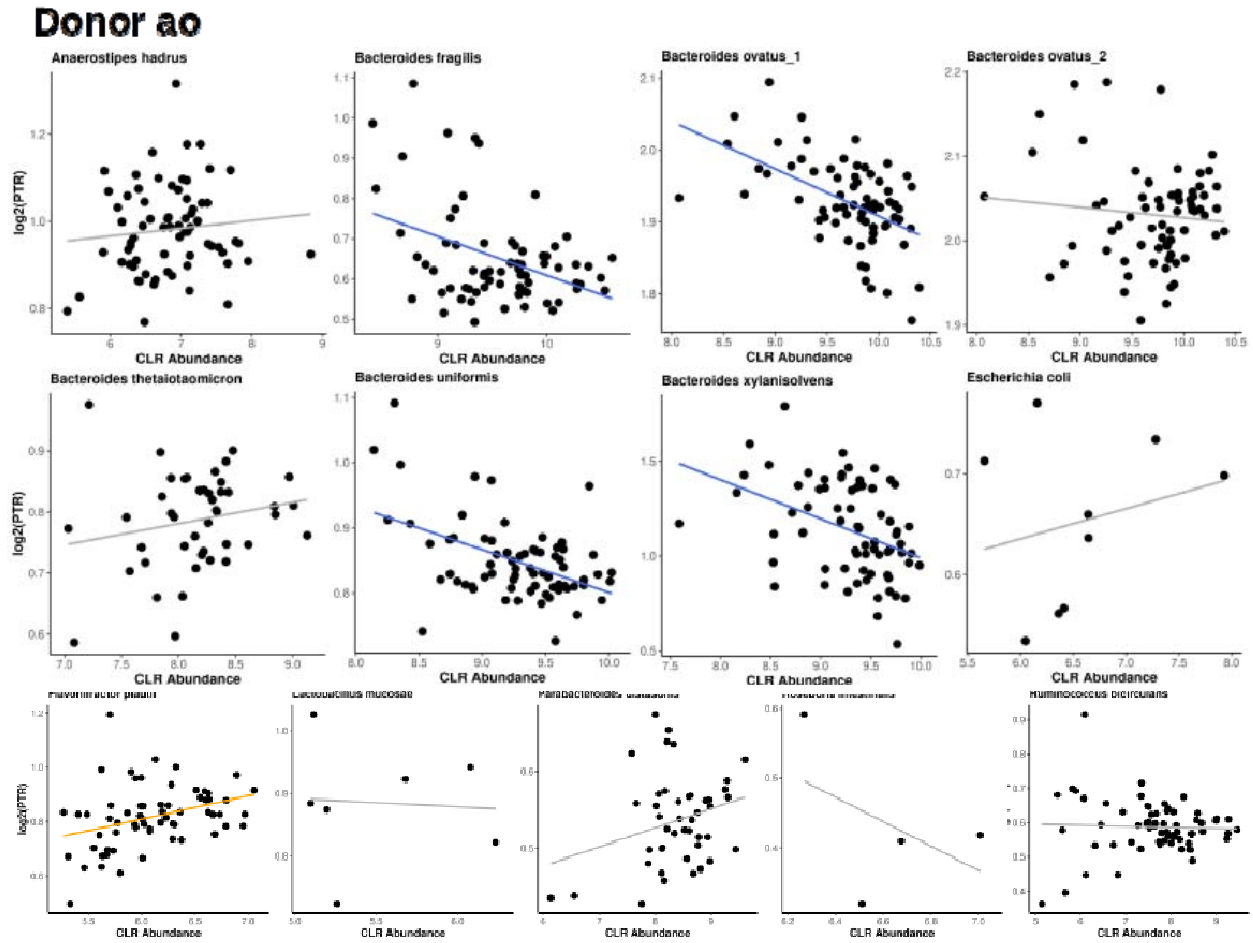

819  
820 **Figure S8. Relationships between abundance and  $\log_2(\text{PTR})$  for individual taxon in donor**  
821 **ao.** Abundant taxa with relatively dense longitudinal PTR and abundance data (at least 5  
822 matched data points; time differences between adjacent samples less than three days) were  
823 selected for analysis. Gray trend lines show no significant correlations, orange trend lines  
824 indicate significant positive correlations, and blue trend lines represent significant negative  
825 correlations (linear regression, BH-FDR < 0.05).  
826

A

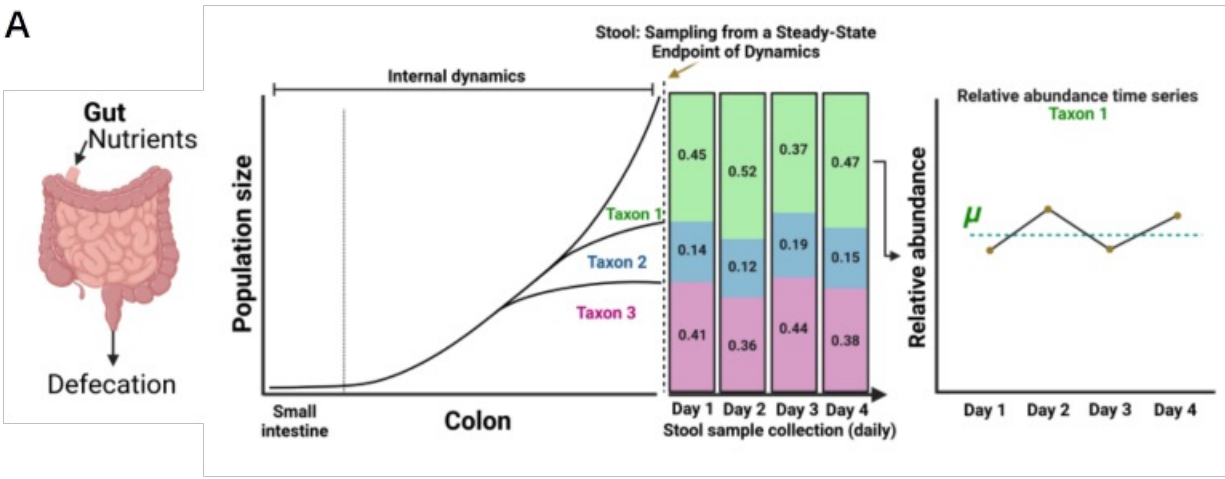

B

### 4 healthy human donors longitudinal fecal microbiome collection

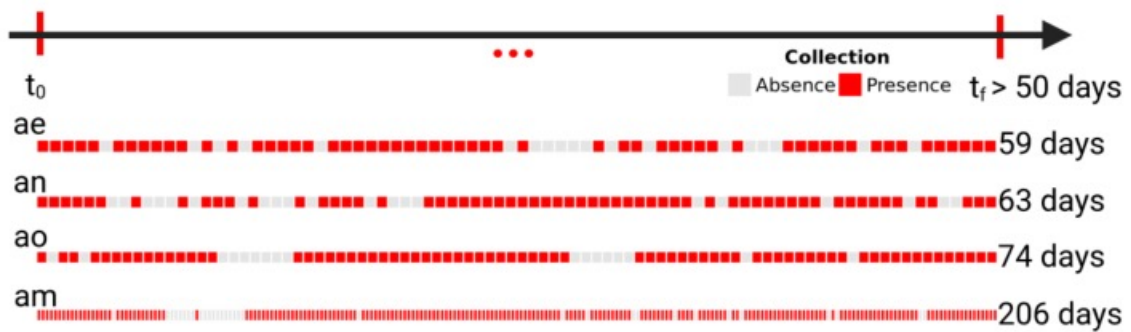

# A Quasi-stationary Time Series

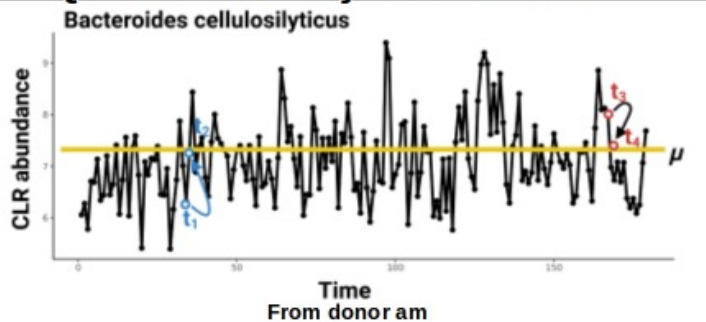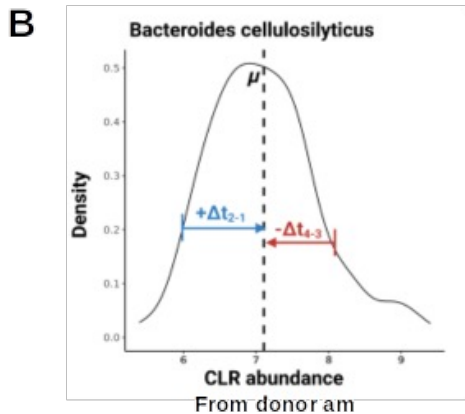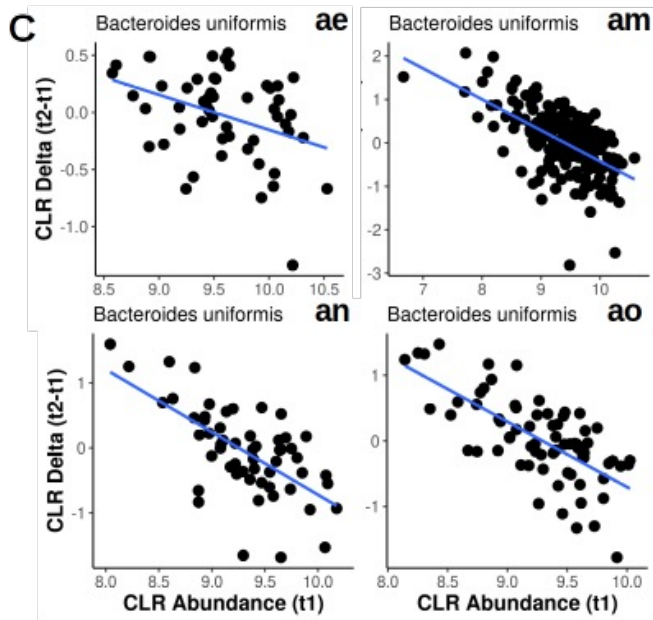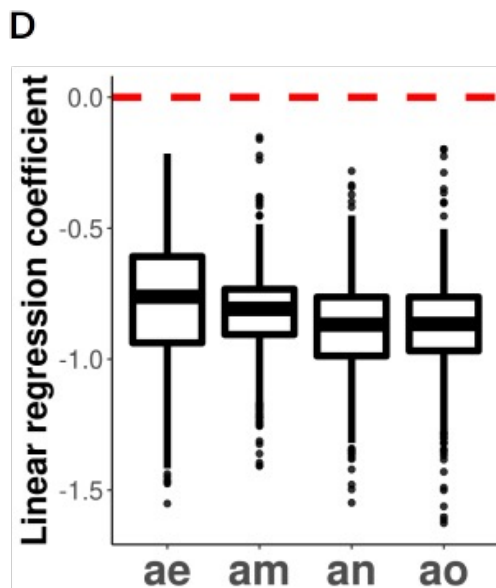

# A *Bacteroides ovatus\_1*

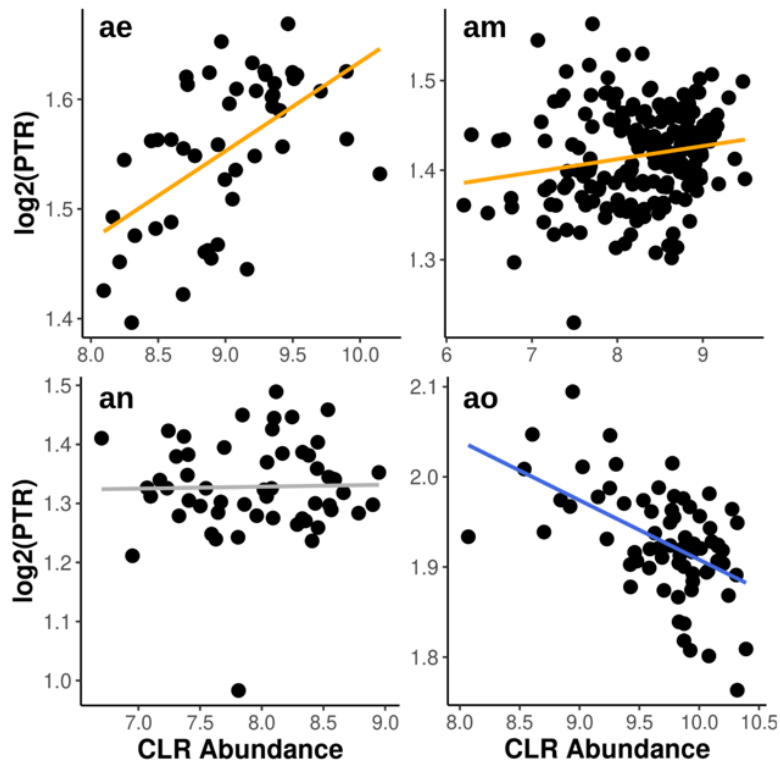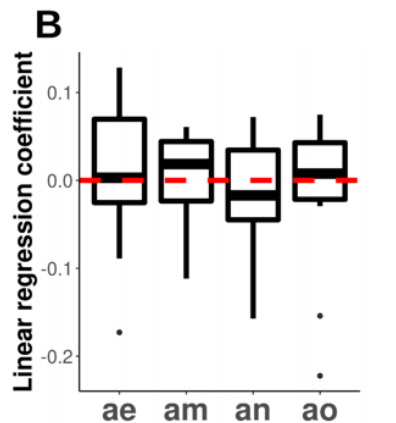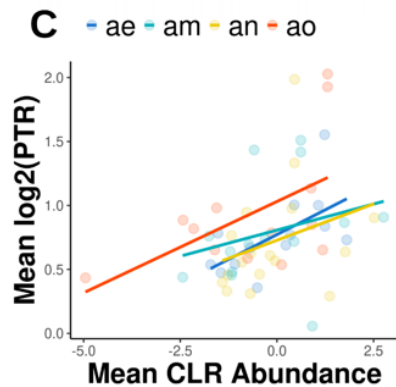

# A Logistic growth of microbiota

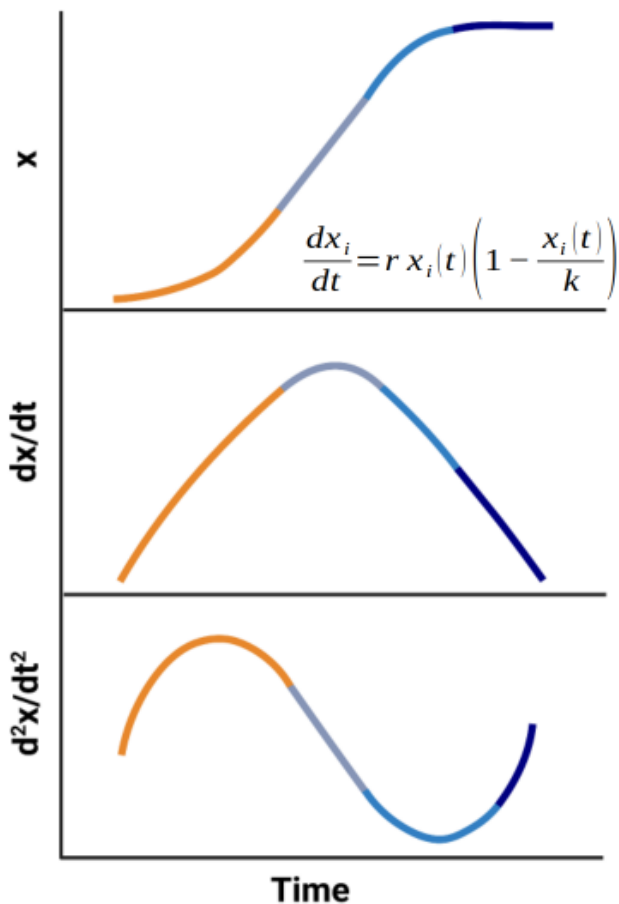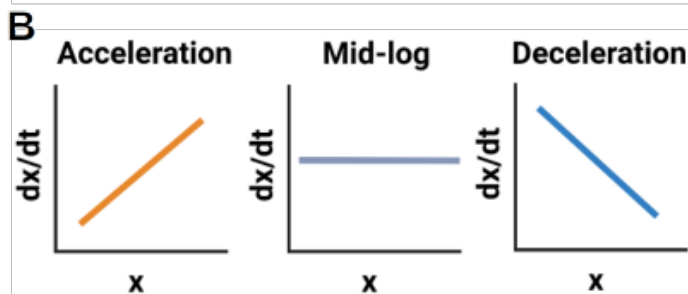

**A** Simulated growth with stochastic  $x$ 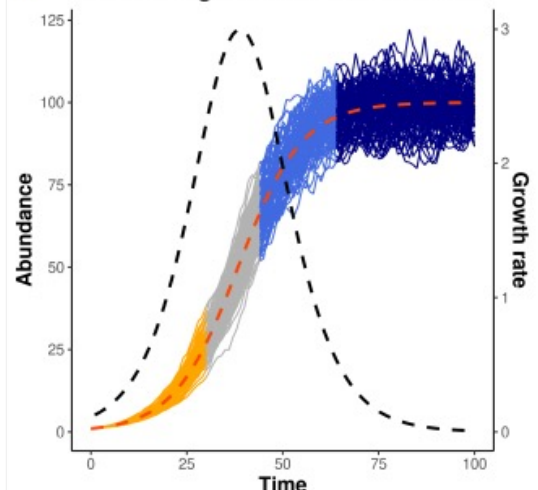

$$\frac{dx_i}{dt} = r x_i |t| \left( 1 - \frac{x_i |t|}{K} \right) + \sigma x_i |t| \omega |t|$$

**B**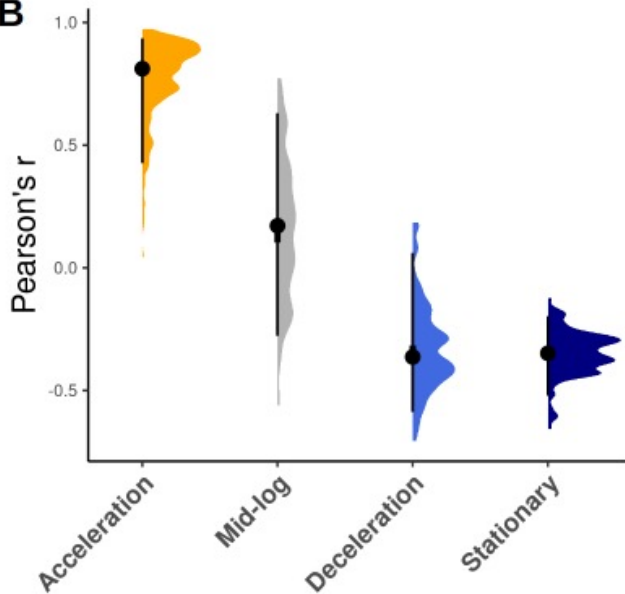**C**

Acceleration

Mid-log

Deceleration

Stationary

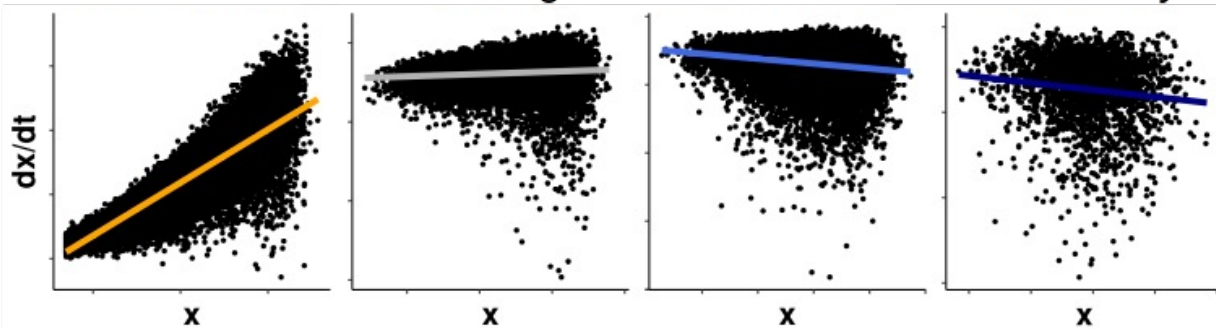

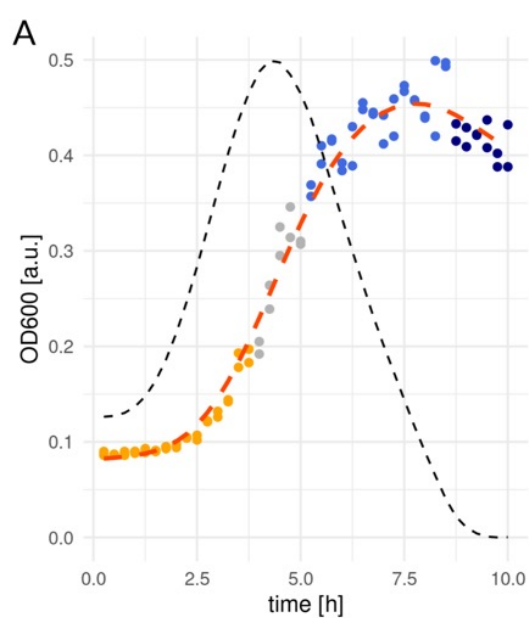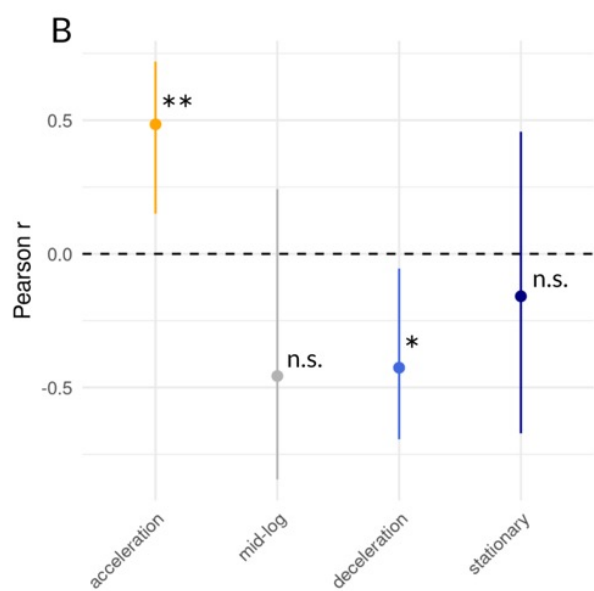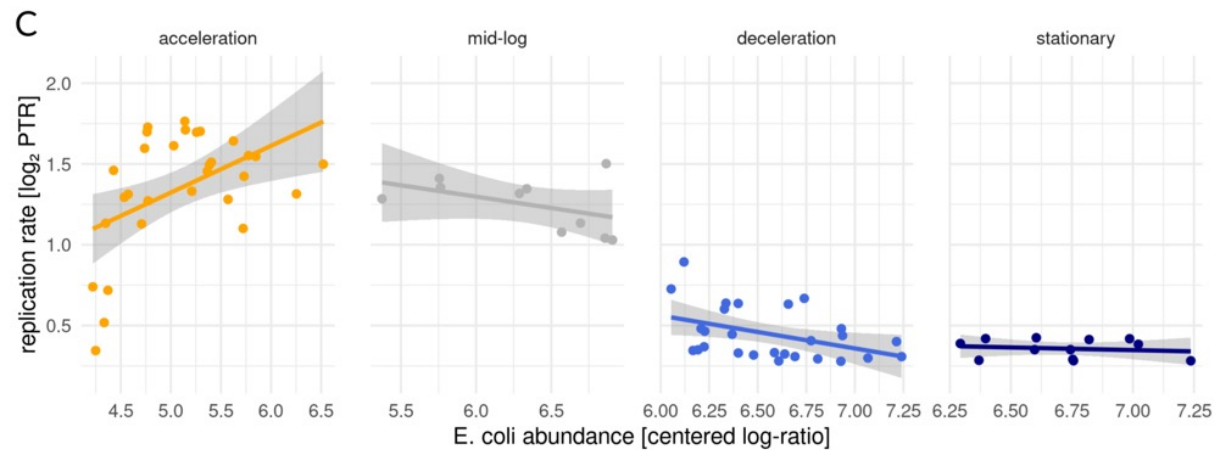

A

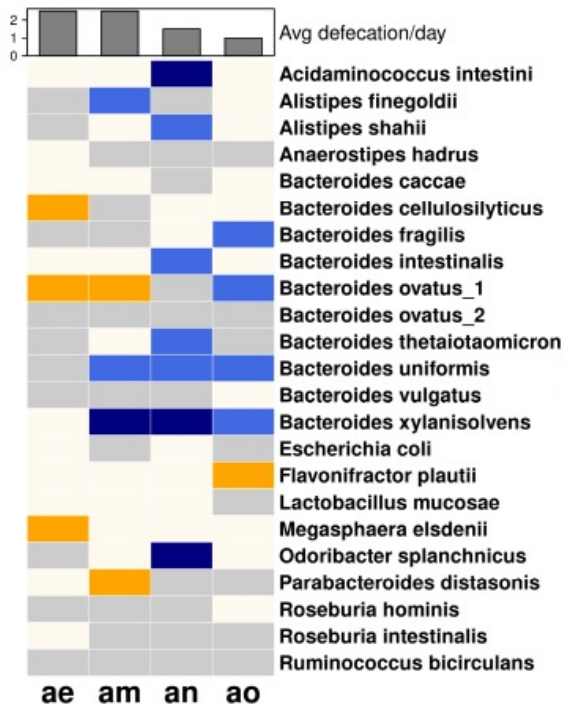

B

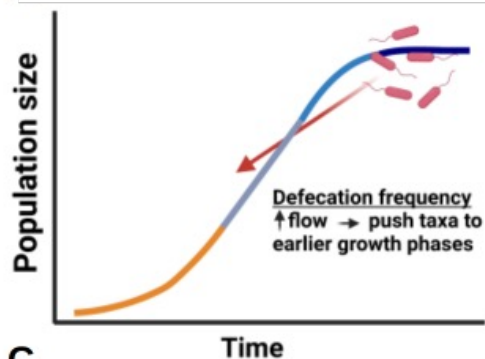

C

Growth phases inferred from abundance - PTR relationships

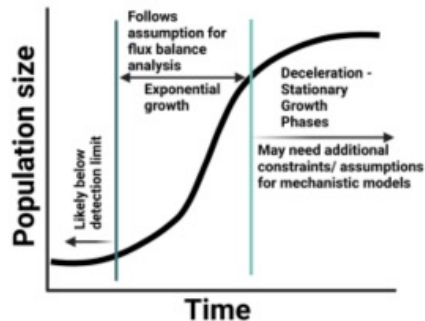



**Calorie**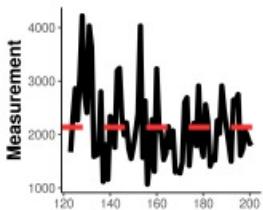**Carbohydrate**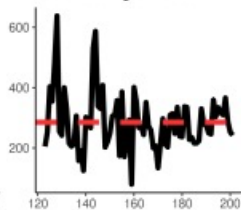**Protein**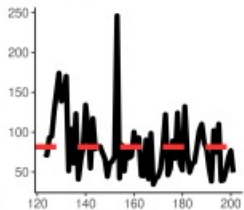**Fat**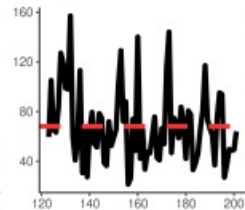**Fiber**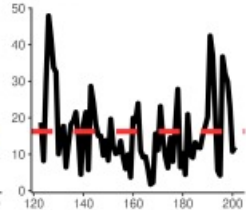**Cholesterol**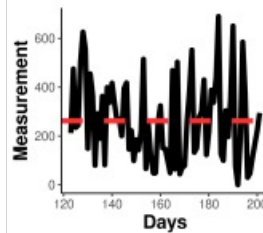**Saturated fat**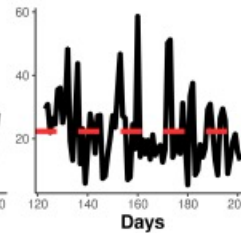**Sugar**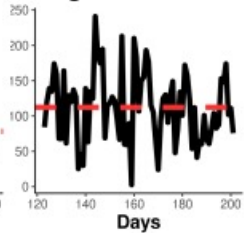**Sodium**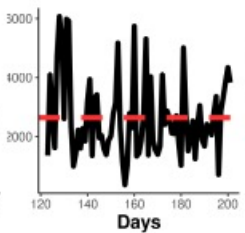**Calcium**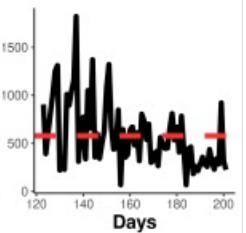

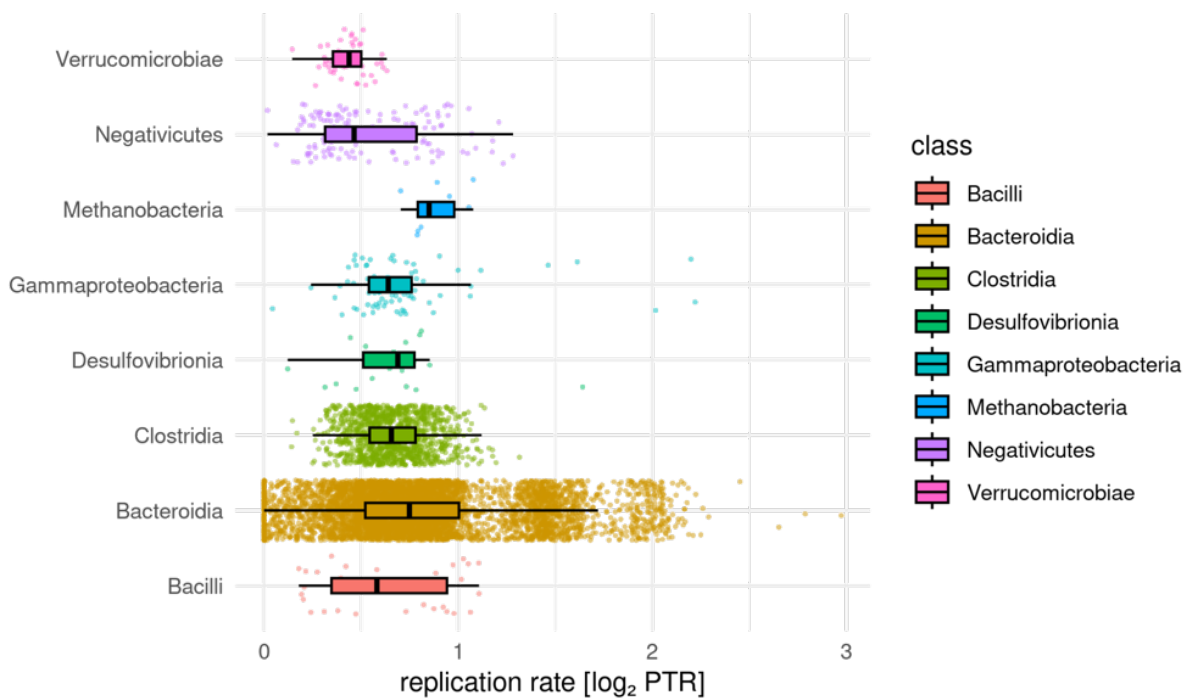

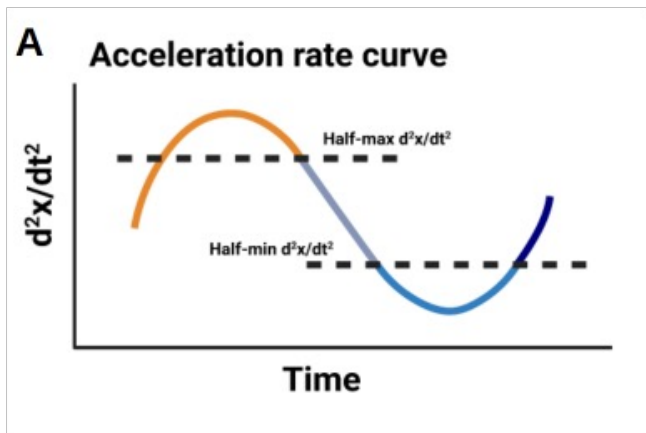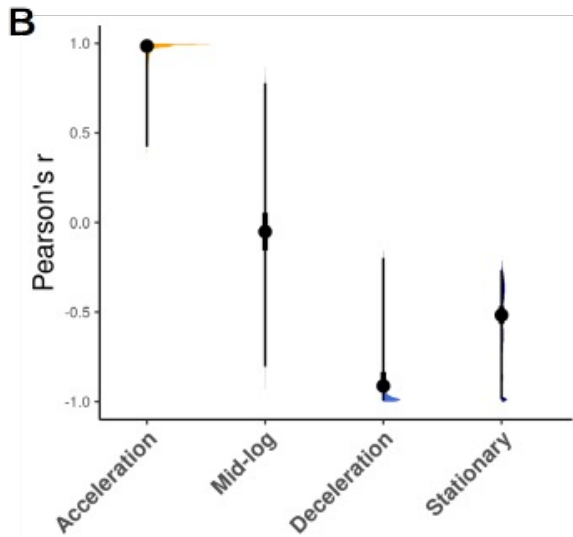

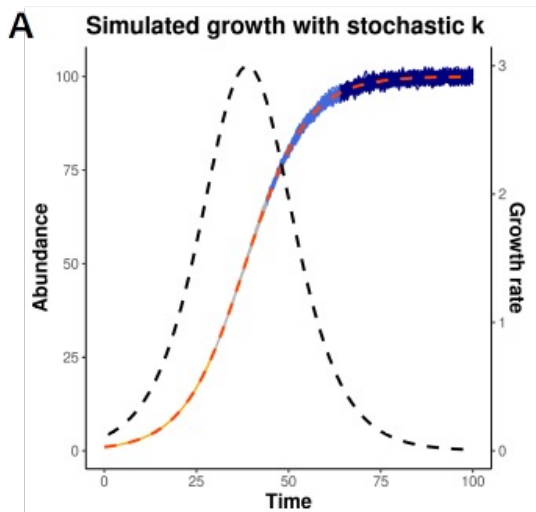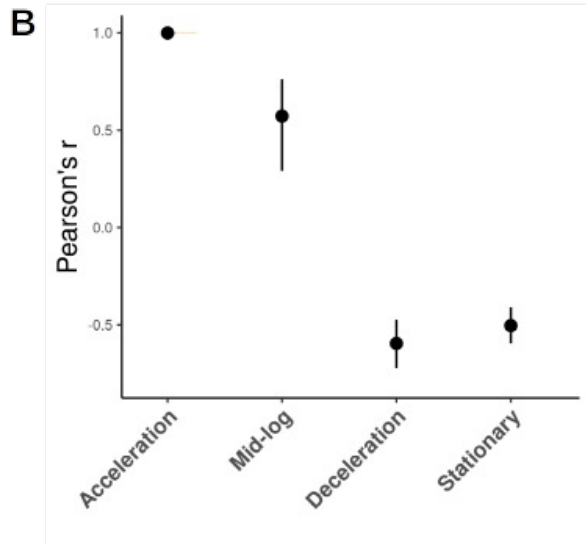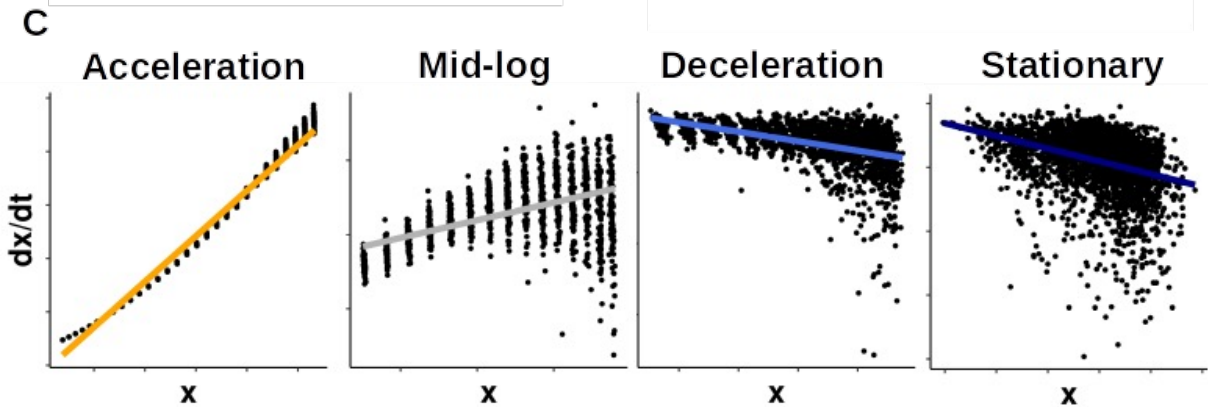

# Donor ae

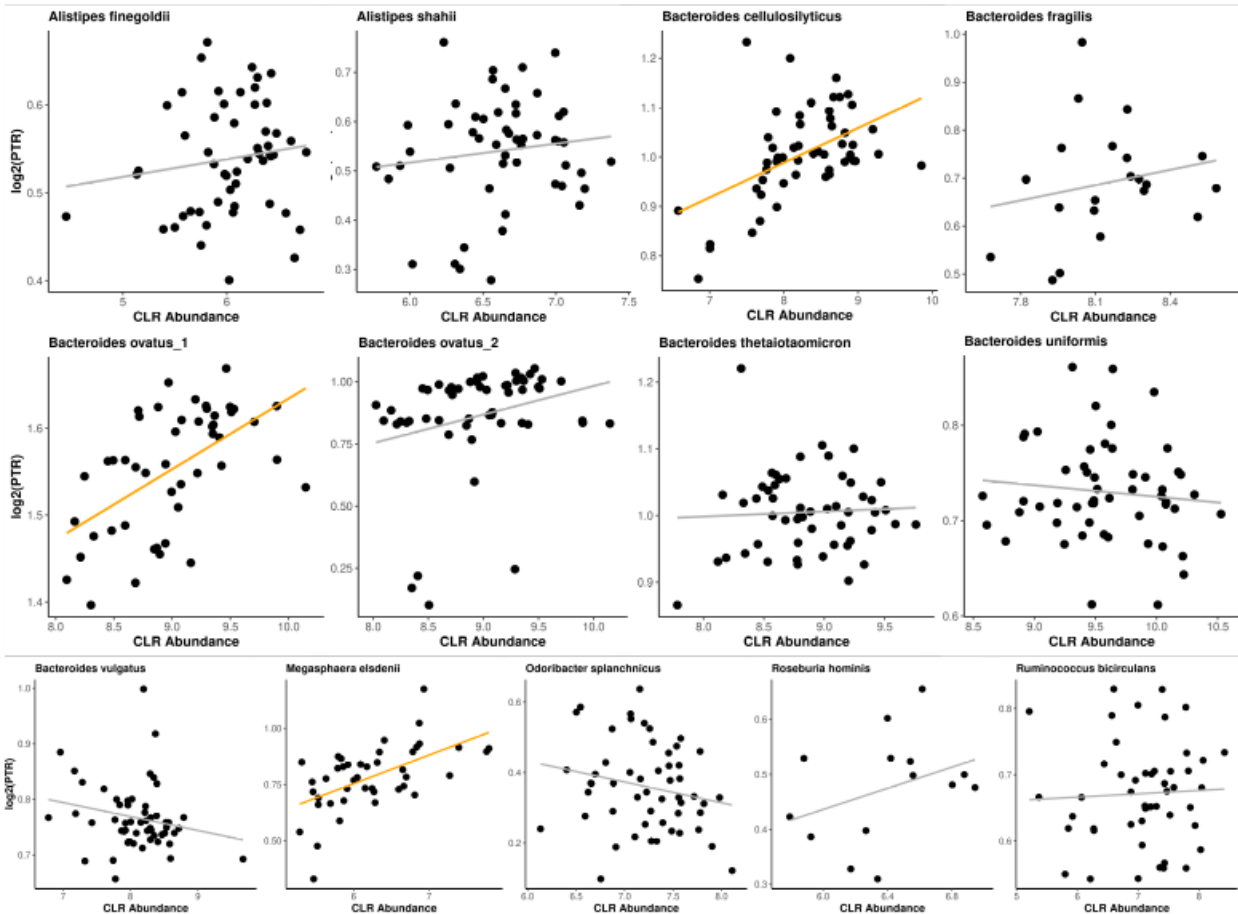

# Donor am

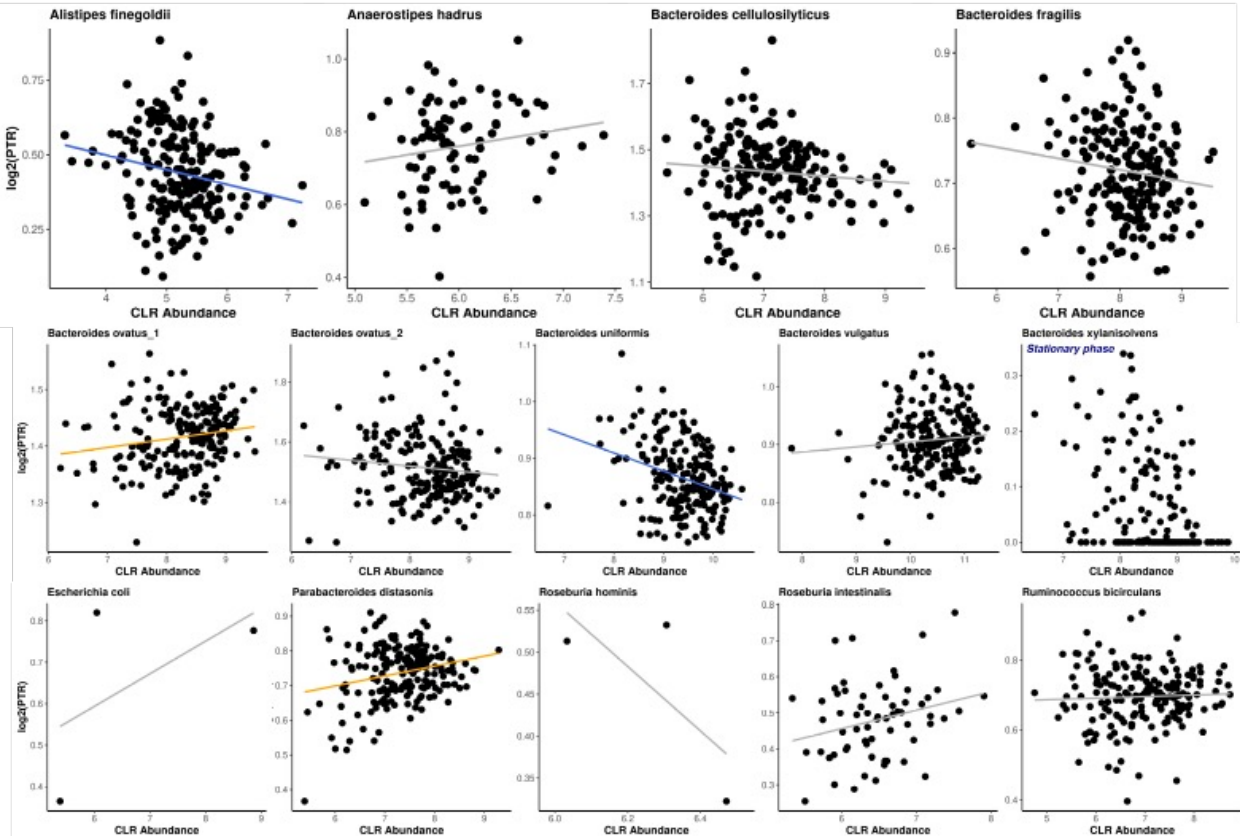

# Donor an

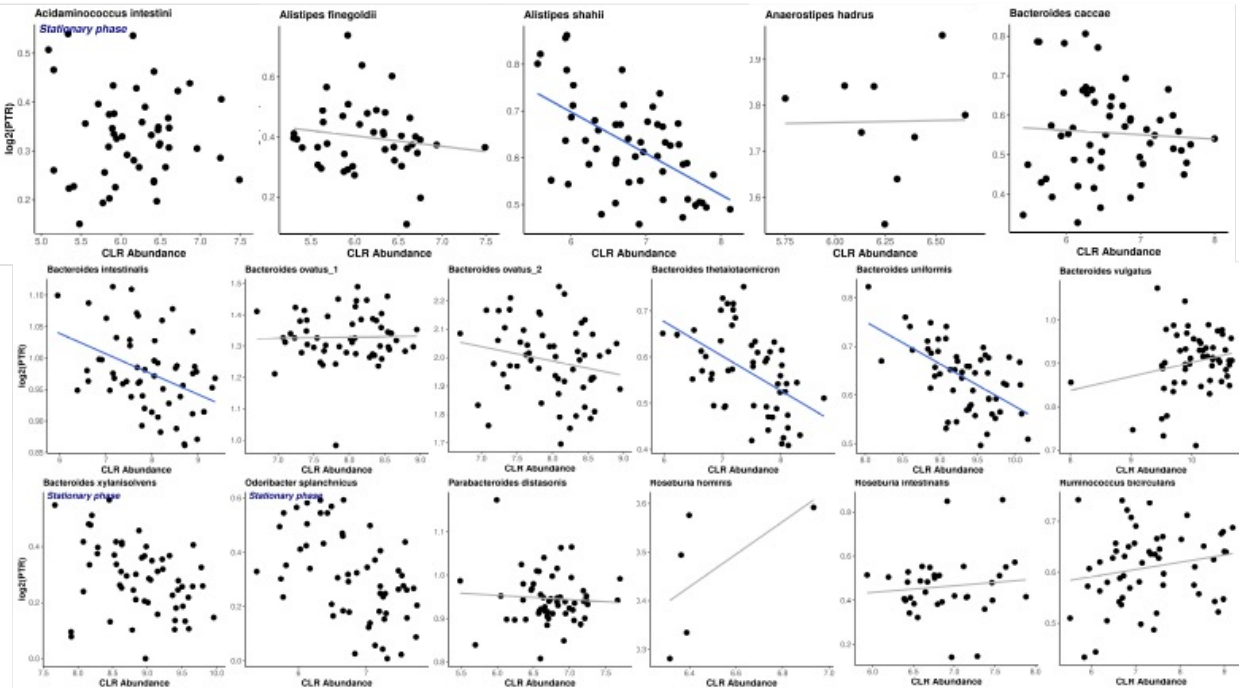

# Donor ao

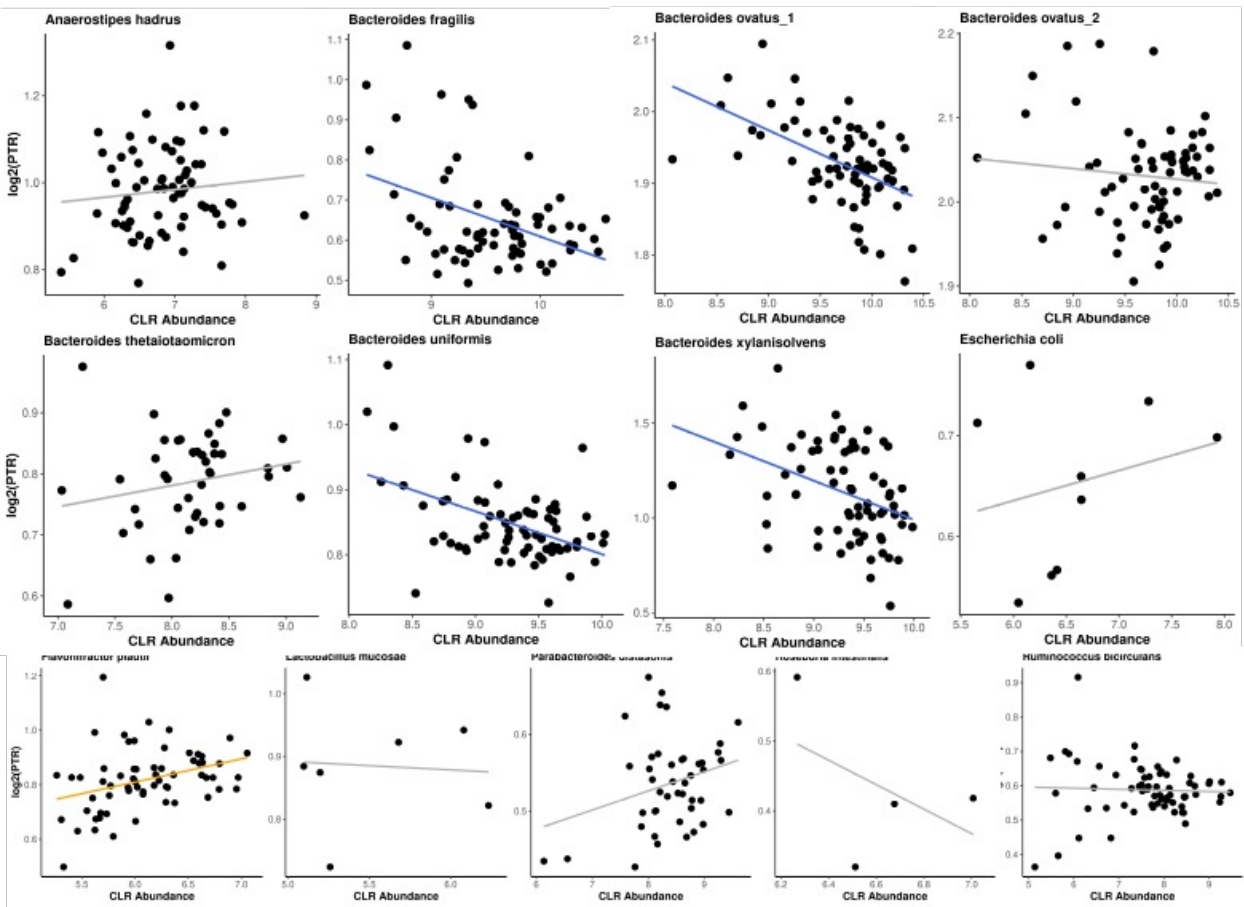

Source: https://www.biorxiv.org/content/10.1101/2022.04.23.489288v2.full.pdf
